# Supplementary material for: Toolbox Accelerating Glycomics (TAG): Glycan Annotation from MALDI-TOF MS Spectra and Mapping Expression Variation to Biosynthetic Pathways
Source: MDPI journal article supplement (doi:10.3390/biom10101383), 2020-09-28

Glycan quantity for each experiment

2: m/z= 1178.4950  
(Hex)2 (HexNAc)2

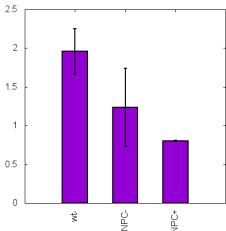

3: m/z= 1340.5478  
(Hex)3 (HexNAc)2

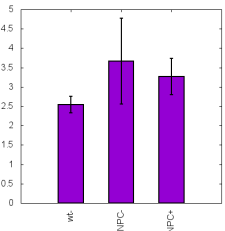

4: m/z= 1502.6006  
(Hex)4 (HexNAc)2

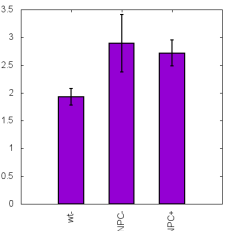

5: m/z= 1664.6534  
(Hex)2 + (Man)3(GlcNAc)2

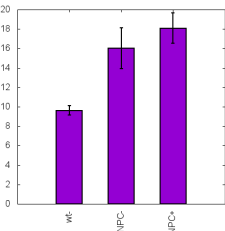

6: m/z= 1162.5001  
(Hex)1 (HexNAc)2 (Fuc)1

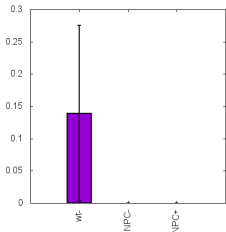

7: m/z= 1324.5529  
(Hex)2 (HexNAc)2 (Fuc)1

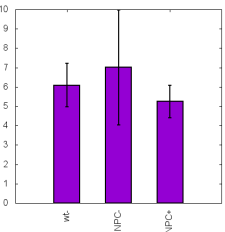

8: m/z= 1486.6057  
(Hex)3 (HexNAc)2 (Fuc)1

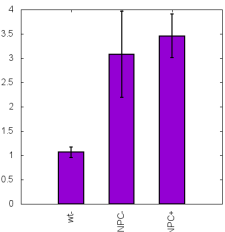

9: m/z= 1648.6585  
(Hex)4 (HexNAc)2 (Fuc)1

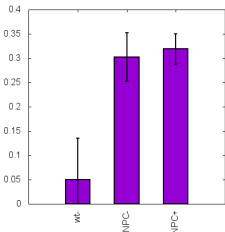

10: m/z= 1810.7113  
(Hex)2 (Fuc)1 + (Man)3(GlcNAc)2

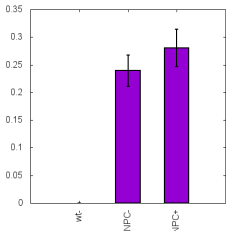

11: m/z= 1826.7062  
(Hex)3 + (Man)3(GlcNAc)2

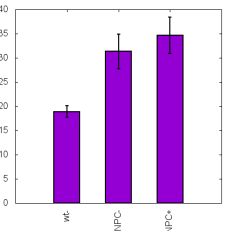

12: m/z= 1988.7590  
(Hex)4 + (Man)3(GlcNAc)2

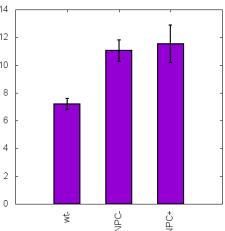

13: m/z= 2150.8118  
(Hex)5 + (Man)3(GlcNAc)2

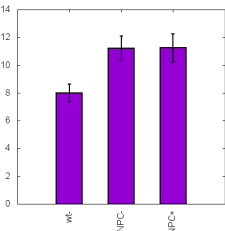

14: m/z= 2312.8646  
(Hex)6 + (Man)3(GlcNAc)2

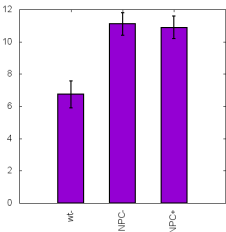

18: m/z= 1543.6271  
(HexNAc)1 + (Man)3(GlcNAc)2

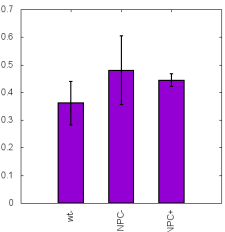

19: m/z= 1746.7064  
(HexNAc)2 + (Man)3(GlcNAc)2

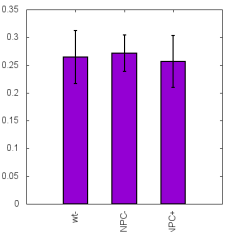

22: m/z= 1705.6799  
(Hex)1 (HexNAc)1 + (Man)3(GlcNAc)2

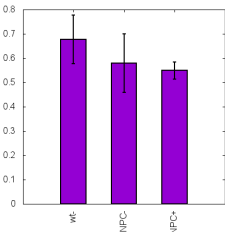

23: m/z= 1908.7592  
(Hex)1 (HexNAc)2 + (Man)3(GlcNAc)2

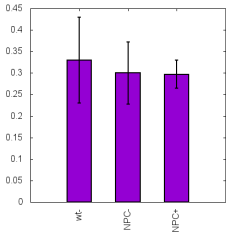

26: m/z= 1867.7327  
(Hex)2 (HexNAc)1 + (Man)3(GlcNAc)2

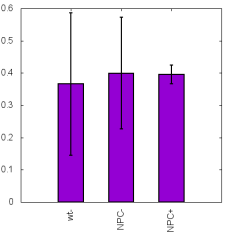

27: m/z= 2070.8120  
(Hex)2 (HexNAc)2 + (Man)3(GlcNAc)2

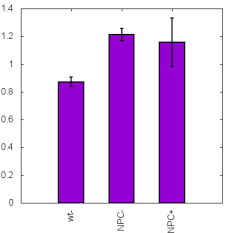

30: m/z= 2029.7855  
(Hex)3 (HexNAc)1 + (Man)3(GlcNAc)2

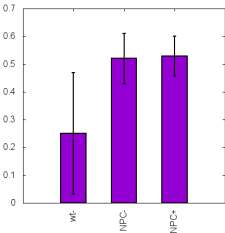

32: m/z= 2435.9441  
(Hex)3 (HexNAc)3 + (Man)3(GlcNAc)2

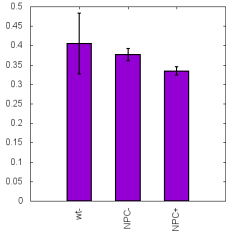

38: m/z= 1689.6850  
(HexNAc)1 (Fuc)1 + (Man)3(GlcNAc)2

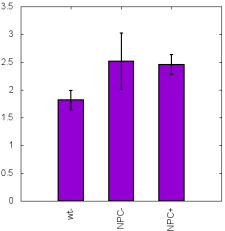

39: m/z= 1892.7643  
(HexNAc)2 (Fuc)1 + (Man)3(GlcNAc)2

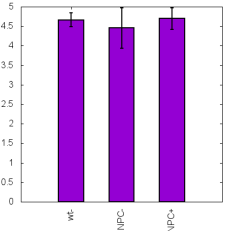

40: m/z= 2095.8436  
(HexNAc)3 (Fuc)1 + (Man)3(GlcNAc)2

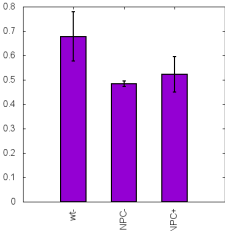

41: m/z= 2298.9229  
(HexNAc)4 (Fuc)1 + (Man)3(GlcNAc)2

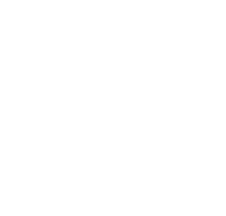

42: m/z= 1851.7378  
(Hex)1 (HexNAc)1 (Fuc)1 + (Man)3(GlcNAc)2

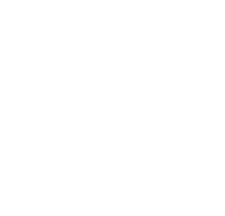

43: m/z= 2054.8171  
(Hex)1 (HexNAc)2 (Fuc)1 + (Man)3(GlcNAc)2



44: m/z= 2257.8964  
(Hex)1 (HexNAc)3 (Fuc)1 + (Man)3(GlcNAc)2



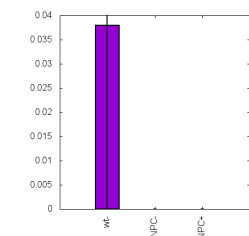

46: m/z= 2013.7906  
(Hex)2 (HexNAc)1 (Fuc)1 + (Man)3(GlcNAc)2

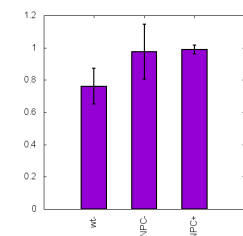

47: m/z= 2216.8699  
(Hex)2 (HexNAc)2 (Fuc)1 + (Man)3(GlcNAc)2

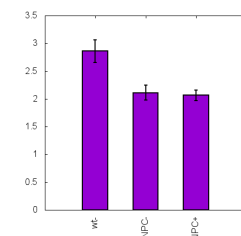

48: m/z= 2419.9492  
(Hex)2 (HexNAc)3 (Fuc)1 + (Man)3(GlcNAc)2

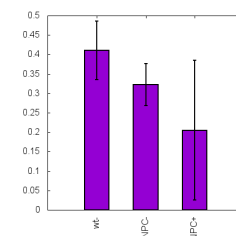

50: m/z= 2175.8434  
(Hex)3 (HexNAc)1 (Fuc)1 + (Man)3(GlcNAc)2

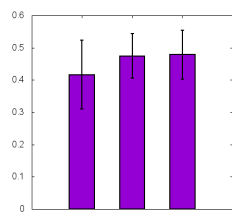

52: m/z= 2582.0020  
(Hex)3 (HexNAc)3 (Fuc)1 + (Man)3(GlcNAc)2

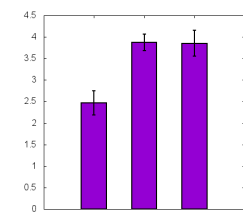

57: m/z= 2947.1341  
(Hex)4 (HexNAc)4 (Fuc)1 + (Man)3(GlcNAc)2

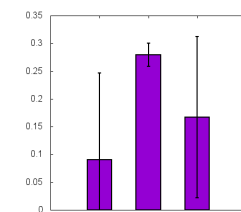

88: m/z= 2010.7909  
(Hex)1 (HexNAc)1 (NeuAc)1 + (Man)3(GlcNAc)2

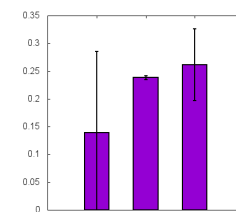

92: m/z= 2172.8437  
(Hex)2 (HexNAc)1 (NeuAc)1 + (Man)3(GlcNAc)2

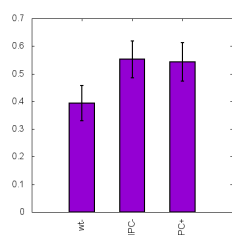

93: m/z= 2375.9230  
(Hex)2 (HexNAc)2 (NeuAc)1 + (Man)3(GlcNAc)2

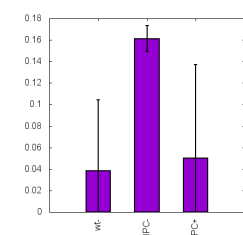

94: m/z= 2579.0023  
(Hex)2 (HexNAc)3 (NeuAc)1 + (Man)3(GlcNAc)2

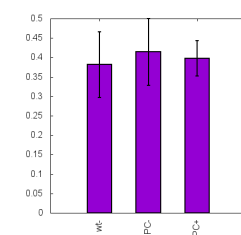

96: m/z= 2334.8965  
(Hex)3 (HexNAc)1 (NeuAc)1 + (Man)3(GlcNAc)2

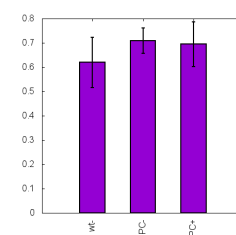

97: m/z= 2537.9758  
(Hex)3 (HexNAc)2 (NeuAc)1 + (Man)3(GlcNAc)2

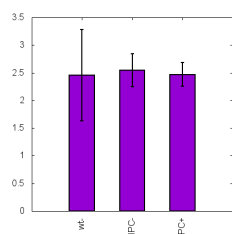

98: m/z= 2741.0551  
(Hex)3 (HexNAc)3 (NeuAc)1 + (Man)3(GlcNAc)2

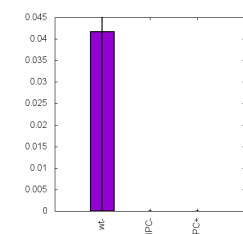

104: m/z= 2156.8488  
(Hex)1 (HexNAc)1 (Fuc)1 (NeuAc)1 + (Man)3(GlcNAc)2

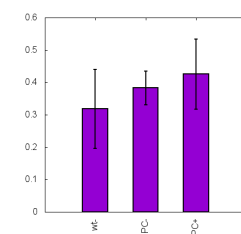

105: m/z= 2359.9281  
(Hex)1 (HexNAc)2 (Fuc)1 (NeuAc)1 + (Man)3(GlcNAc)2

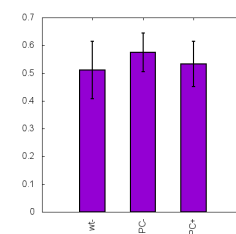

108: m/z= 2318.9016  
(Hex)2 (HexNAc)1 (Fuc)1 (NeuAc)1 + (Man)3(GlcNAc)2

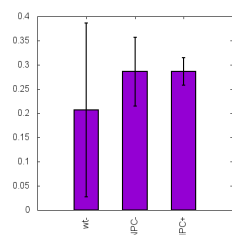

109: m/z= 2521.9809  
(Hex)2 (HexNAc)2 (Fuc)1 (NeuAc)1 + (Man)3(GlcNAc)2

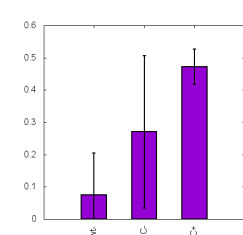

114: m/z= 2887.1130  
(Hex)3 (HexNAc)3 (Fuc)1 (NeuAc)1 + (Man)3(GlcNAc)2

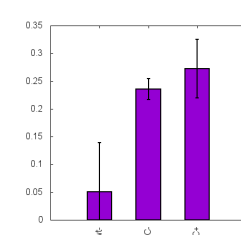

119: m/z= 3252.2451  
(Hex)4 (HexNAc)4 (Fuc)1 (NeuAc)1 + (Man)3(GlcNAc)2

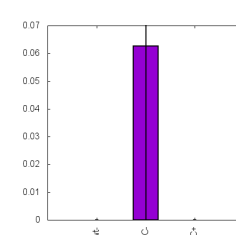

151: m/z= 2417.9335  
(Hex)2 (HexNAc)2 (NeuAc)1 (Ac)1 + (Man)3(GlcNAc)2

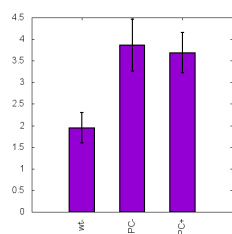

204: m/z= 2681.0340  
(Hex)2 (HexNAc)2 (NeuAc)2 + (Man)3(GlcNAc)2

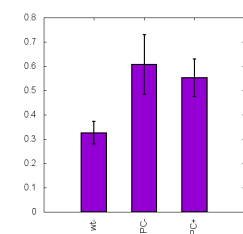

207: m/z= 2843.0868  
(Hex)3 (HexNAc)2 (NeuAc)2 + (Man)3(GlcNAc)2

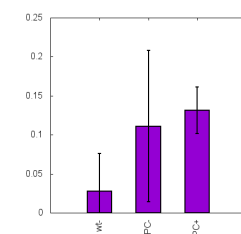

208: m/z= 3046.1661  
(Hex)3 (HexNAc)3 (NeuAc)2 + (Man)3(GlcNAc)2

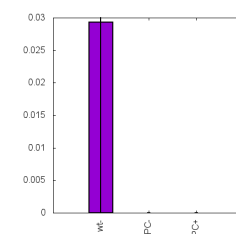

211: m/z= 3208.2189  
(Hex)4 (HexNAc)3 (NeuAc)2 + (Man)3(GlcNAc)2

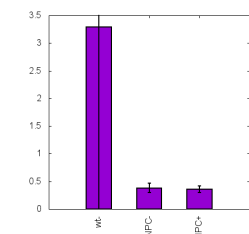

213: m/z= 2827.0919  
(Hex)2 (HexNAc)2 (Fuc)1 (NeuAc)2 + (Man)3(GlcNAc)2

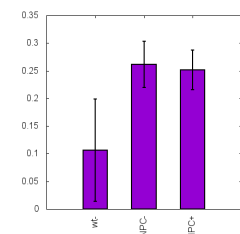

217: m/z= 3192.2240  
(Hex)3 (HexNAc)3 (Fuc)1 (NeuAc)2 + (Man)3(GlcNAc)2

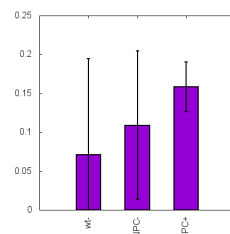

221: m/z= 3557.3561  
(Hex)4 (HexNAc)4 (Fuc)1 (NeuAc)2 + (Man)3(GlcNAc)2

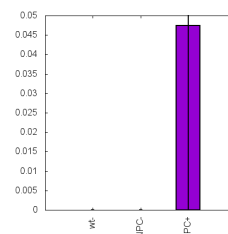

306: m/z= 3351.2771  
(Hex)3 (HexNAc)3 (NeuAc)3 + (Man)3(GlcNAc)2

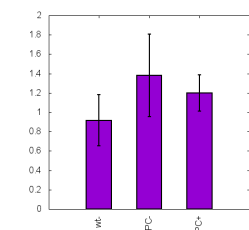

310: m/z= 3497.3350  
(Hex)3 (HexNAc)3 (Fuc)1 (NeuAc)3 + (Man)3(GlcNAc)2

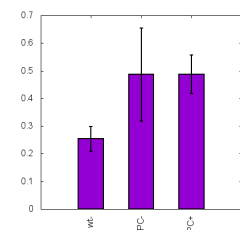

313: m/z= 3862.4671  
(Hex)4 (HexNAc)4 (Fuc)1 (NeuAc)3 + (Man)3(GlcNAc)2

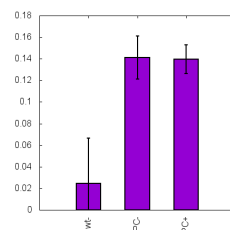

371: m/z= 2391.9179  
(Hex)2 (HexNAc)2 (NeuGc)1 + (Man)3(GlcNAc)2

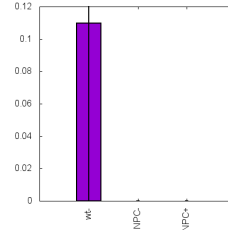

382: m/z= 2172.8437  
(Hex)1 (HexNAc)1 (Fuc)1 (NeuGc)1 + (Man)3(GlcNAc)2

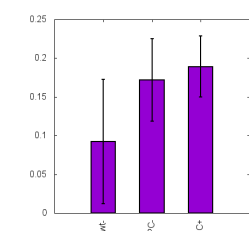

383: m/z= 2375.9230  
(Hex)1 (HexNAc)2 (Fuc)1 (NeuGc)1 + (Man)3(GlcNAc)2

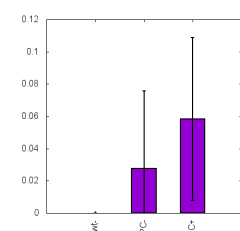

384: m/z= 2579.0023  
(Hex)1 (HexNAc)3 (Fuc)1 (NeuGc)1 + (Man)3(GlcNAc)2

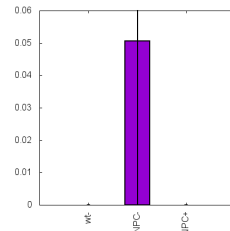

386: m/z= 2334.8965  
(Hex)2 (HexNAc)2 (Fuc)1 (NeuGc)1 + (Man)3(GlcNAc)2

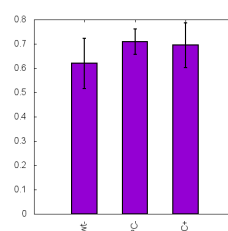

387: m/z= 2537.9758  
(Hex)2 (HexNAc)2 (Fuc)1 (NeuGc)1 + (Man)3(GlcNAc)2

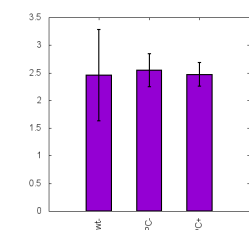

388: m/z= 2741.0551  
(Hex)1 (HexNAc)2 (Fuc)1 (NeuGc)1 + (Man)3(GlcNAc)2

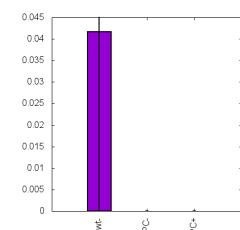

401: m/z= 2887.1130  
(Hex)2 (HexNAc)3 (Fuc)2 (NeuGc)1 + (Man)3(GlcNAc)2

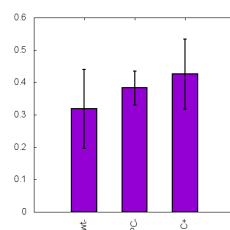

406: m/z= 3252.2451  
(Hex)2 (HexNAc)4 (Fuc)2 (NeuGc)1 + (Man)3(GlcNAc)2

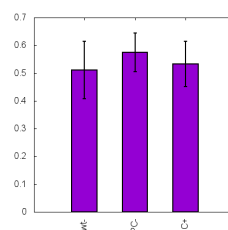

428: m/z= 2230.8491  
(Hex)2 (HexNAc)1 (NeuGc)1 (Ac)1 + (Man)3(GlcNAc)2

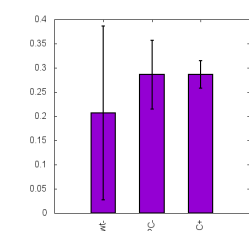

441: m/z= 2417.9335  
(Hex)1 (HexNAc)2 (Fuc)1 (NeuGc)1 (Ac)1 + (Man)3(GlcNAc)2

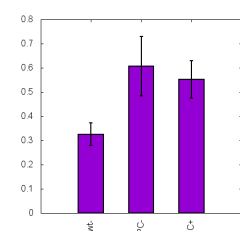

491: m/z= 2843.0868  
(Hex)2 (HexNAc)2 (Fuc)1 (NeuAc)1 (NeuGc)1 + (Man)3(GlcNAc)2

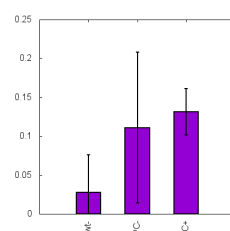

492: m/z= 3046.1661  
(Hex)2 (HexNAc)3 (Fuc)1 (NeuAc)1 (NeuGc)1 + (Man)3(GlcNAc)2

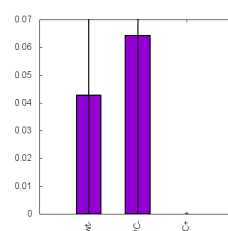

495: m/z= 3208.2189  
(Hex)3 (HexNAc)3 (Fuc)1 (NeuAc)1 (NeuGc)1 + (Man)3(GlcNAc)2

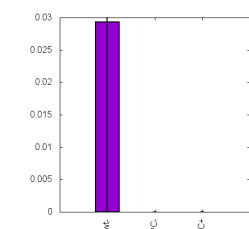

500: m/z= 3192.2240  
(Hex)2 (HexNAc)3 (Fuc)2 (NeuAc)1 (NeuGc)1 + (Man)3(GlcNAc)2

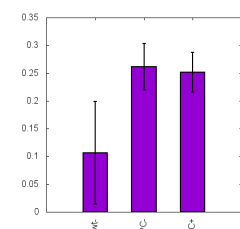

504: m/z= 3557.3561  
(Hex)3 (HexNAc)4 (Fuc)2 (NeuAc)1 (NeuGc)1 + (Man)3(GlcNAc)2

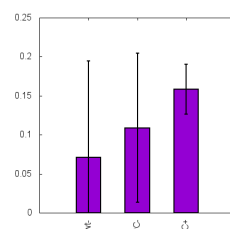

593: m/z= 3862.4671  
(Hex)3 (HexNAc)4 (Fuc)2 (NeuAc)2 (NeuGc)1 + (Man)3(GlcNAc)2

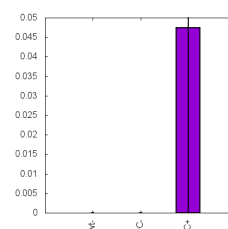

662: m/z= 3208.2189  
(Hex)2 (HexNAc)3 (Fuc)2 (NeuGc)2 + (Man)3(GlcNAc)2

(Man)3(GlcNAc)2

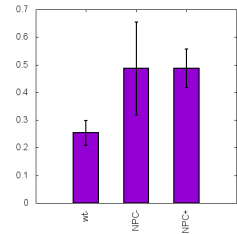

(Man)3(GlcNAc)2

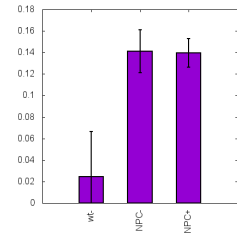

(Man)3(GlcNAc)2

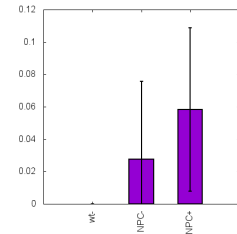

(Man)3(GlcNAc)2

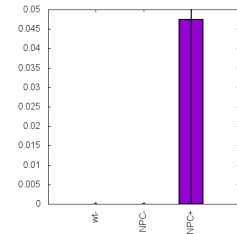

671: m/z= 3557.3561  
(Hex)2 (HexNAc)4 (Fuc)3 (NeuGc)2 +  
(Man)3(GlcNAc)2

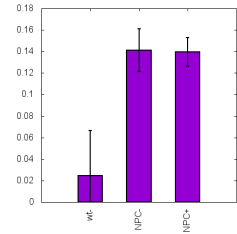

Supplement: s1 [file s1]
