# Supplementary material for: Toolbox Accelerating Glycomics (TAG): Glycan Annotation from MALDI-TOF MS Spectra and Mapping Expression Variation to Biosynthetic Pathways
Source: MDPI journal article supplement (doi:10.3390/biom10101383), 2020-09-28

Glycan quantity for each experiment

2: m/z= 813.3629  
(Hex)1 (HexNAc)1

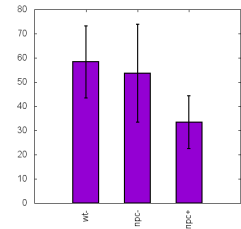

3: m/z= 975.4157  
(Hex)2 (HexNAc)1

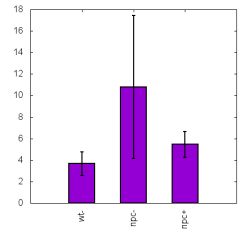

4: m/z= 1137.4685  
(Hex)3 (HexNAc)1

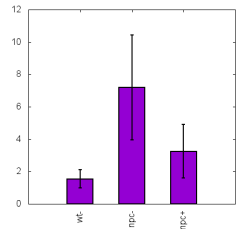

5: m/z= 1299.5213  
(Hex)4 (HexNAc)1

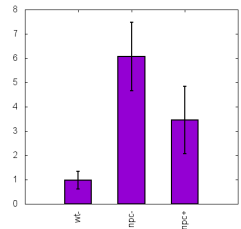

6: m/z= 1461.5741  
(Hex)2 + (Man)3(GlcNAc)1

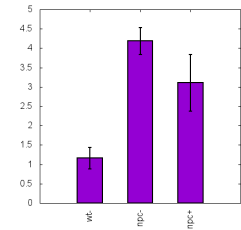

8: m/z= 1016.4422  
(Hex)1 (HexNAc)2

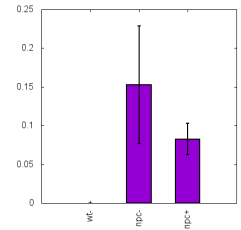

9: m/z= 1178.4950  
(Hex)2 (HexNAc)2

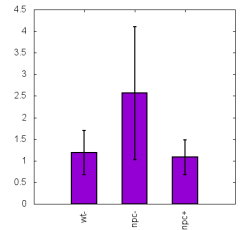

10: m/z= 1340.5478  
(Hex)3 (HexNAc)2

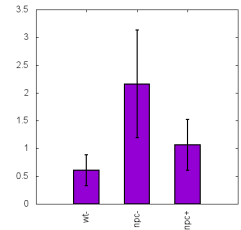

11: m/z= 1502.6006  
(Hex)4 (HexNAc)2

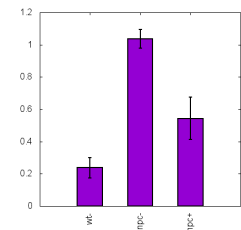

12: m/z= 1664.6534  
(Hex)2 + (Man)3(GlcNAc)2

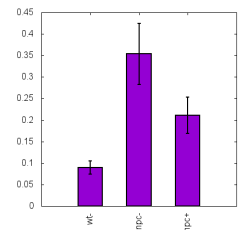

20: m/z= 1486.6057  
(Hex)3 (HexNAc)2 (Fuc)1

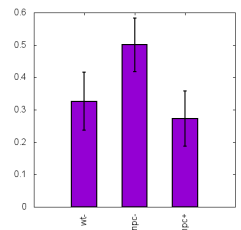

21: m/z= 1648.6585  
(Hex)4 (HexNAc)2 (Fuc)1

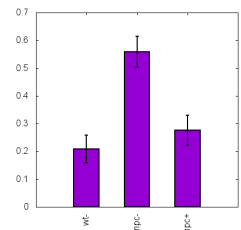

23: m/z= 1623.6269  
(Hex)3 + (Man)3(GlcNAc)1

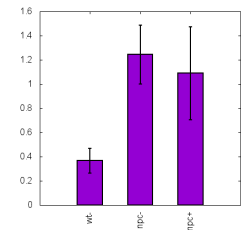

24: m/z= 1785.6797  
(Hex)4 + (Man)3(GlcNAc)1

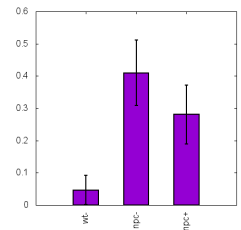

25: m/z= 1947.7325  
(Hex)5 + (Man)3(GlcNAc)1

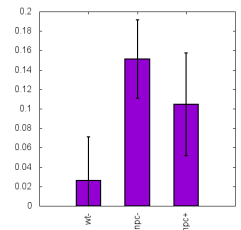

26: m/z= 2109.7853  
(Hex)6 + (Man)3(GlcNAc)1

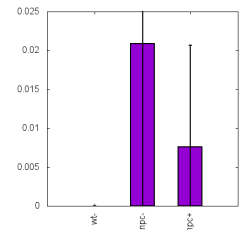

27: m/z= 1826.7062  
(Hex)3 + (Man)3(GlcNAc)2

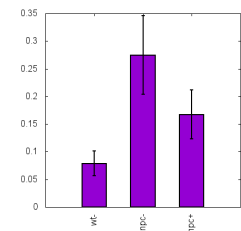

28: m/z= 1988.7590  
(Hex)4 + (Man)3(GlcNAc)2

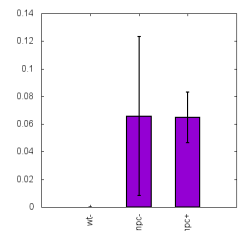

29: m/z= 2150.8118  
(Hex)5 + (Man)3(GlcNAc)2

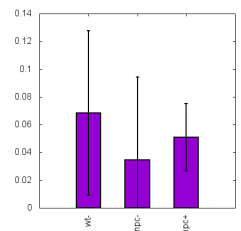

37: m/z= 1340.5478  
(HexNAc)1 + (Man)3(GlcNAc)1

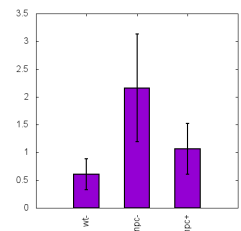

38: m/z= 1543.6271  
(HexNAc)1 + (Man)3(GlcNAc)2

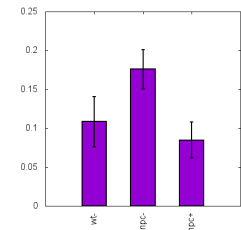

39: m/z= 1543.6271  
(HexNAc)2 + (Man)3(GlcNAc)1

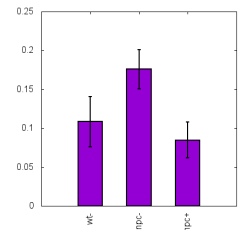

40: m/z= 1746.7064  
(HexNAc)2 + (Man)3(GlcNAc)2

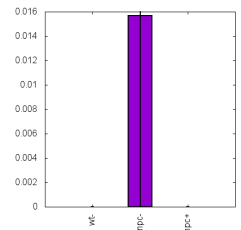

41: m/z= 1746.7064  
(HexNAc)3 + (Man)3(GlcNAc)1

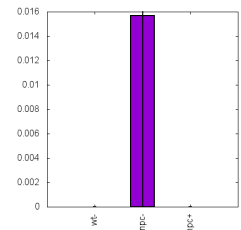

45: m/z= 1502.6006  
(Hex)1 (HexNAc)1 + (Man)3(GlcNAc)1

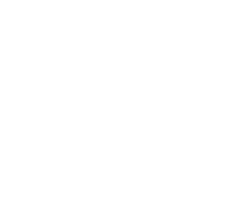

46: m/z= 1705.6799  
(Hex)1 (HexNAc)1 + (Man)3(GlcNAc)2



47: m/z= 1705.6799  
(Hex)1 (HexNAc)2 + (Man)3(GlcNAc)1



48: m/z= 1908.7592  
(Hex)1 (HexNAc)2 + (Man)3(GlcNAc)2



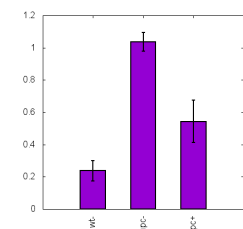

49: m/z= 1908.7592  
(Hex)1 (HexNAc)3 + (Man)3(GlcNAc)1

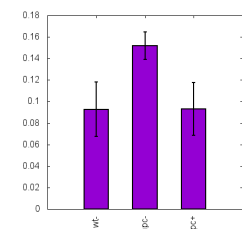

53: m/z= 1664.6534  
(Hex)2 (HexNAc)1 + (Man)3(GlcNAc)1

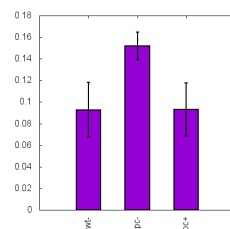

54: m/z= 1867.7327  
(Hex)2 (HexNAc)1 + (Man)3(GlcNAc)2

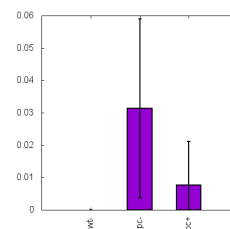

55: m/z= 1867.7327  
(Hex)2 (HexNAc)2 + (Man)3(GlcNAc)1

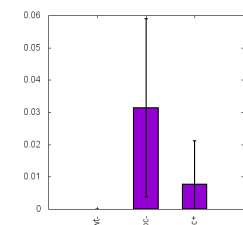

56: m/z= 2070.8120  
(Hex)2 (HexNAc)2 + (Man)3(GlcNAc)2

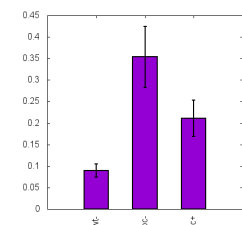

57: m/z= 2070.8120  
(Hex)2 (HexNAc)3 + (Man)3(GlcNAc)1

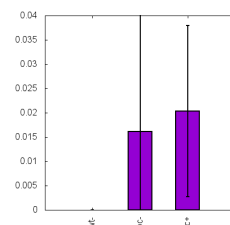

61: m/z= 1826.7062  
(Hex)3 (HexNAc)1 + (Man)3(GlcNAc)1

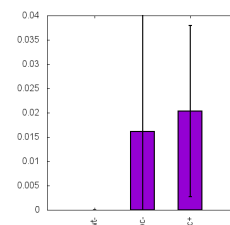

66: m/z= 2435.9441  
(Hex)3 (HexNAc)3 + (Man)3(GlcNAc)2

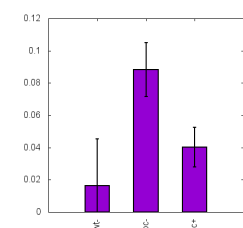

67: m/z= 2435.9441  
(Hex)3 (HexNAc)4 + (Man)3(GlcNAc)1

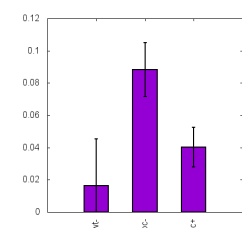

69: m/z= 1988.7590  
(Hex)4 (HexNAc)1 + (Man)3(GlcNAc)1

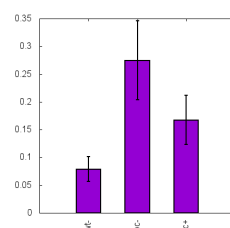

77: m/z= 1486.6057  
(HexNAc)1 (Fuc)1 + (Man)3(GlcNAc)1

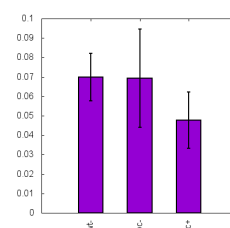

85: m/z= 1648.6585  
(Hex)1 (HexNAc)1 (Fuc)1 + (Man)3(GlcNAc)1

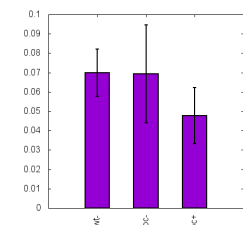

86: m/z= 1851.7378  
(Hex)1 (HexNAc)1 (Fuc)1 + (Man)3(GlcNAc)2

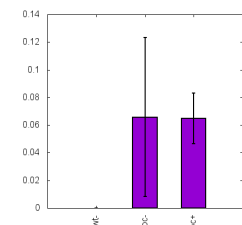

87: m/z= 1851.7378  
(Hex)1 (HexNAc)2 (Fuc)1 + (Man)3(GlcNAc)1

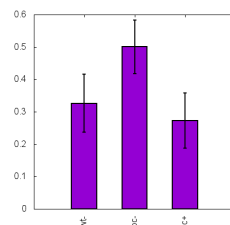

126: m/z= 2159.8485  
(Hex)2 (HexNAc)1 (Fuc)2 + (Man)3(GlcNAc)2

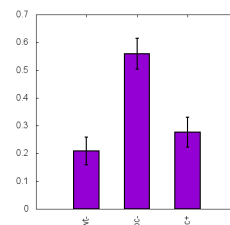

177: m/z= 1807.7116  
(Hex)1 (HexNAc)1 (NeuAc)1 + (Man)3(GlcNAc)1

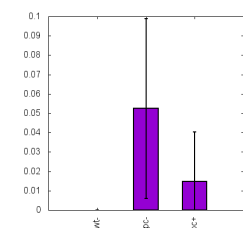

178: m/z= 2010.7909  
(Hex)1 (HexNAc)1 (NeuAc)1 + (Man)3(GlcNAc)2

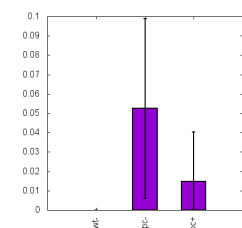

179: m/z= 2010.7909  
(Hex)1 (HexNAc)2 (NeuAc)1 + (Man)3(GlcNAc)1

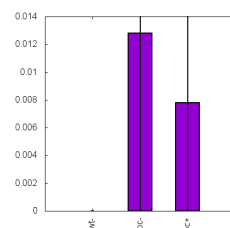

180: m/z= 2213.8702  
(Hex)1 (HexNAc)2 (NeuAc)1 + (Man)3(GlcNAc)2

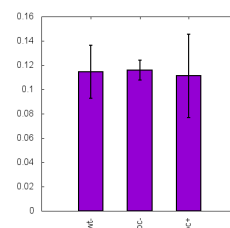

181: m/z= 2213.8702  
(Hex)1 (HexNAc)3 (NeuAc)1 + (Man)3(GlcNAc)1

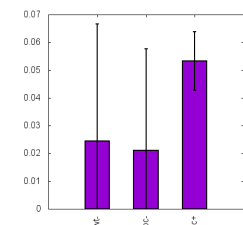

186: m/z= 2172.8437  
(Hex)2 (HexNAc)1 (NeuAc)1 + (Man)3(GlcNAc)2

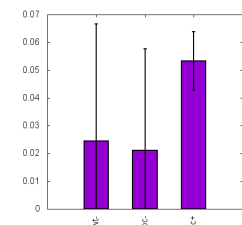

187: m/z= 2172.8437  
(Hex)2 (HexNAc)2 (NeuAc)1 + (Man)3(GlcNAc)1

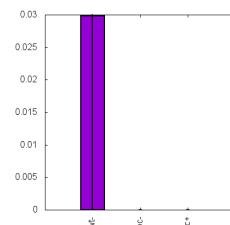

409: m/z= 2477.9547  
(Hex)2 (HexNAc)2 (NeuAc)2 + (Man)3(GlcNAc)1

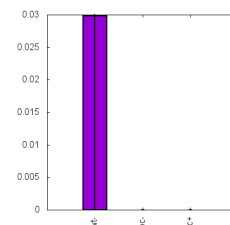

477: m/z= 2519.9652  
(Hex)2 (HexNAc)2 (NeuAc)2 (Ac)1 + (Man)3(GlcNAc)1

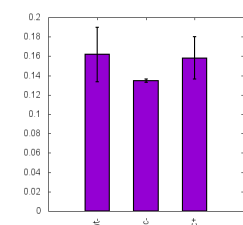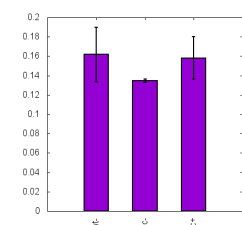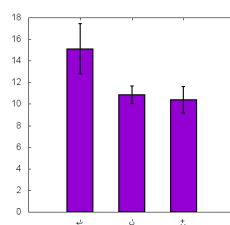

(Man)3(GlcNAc)1

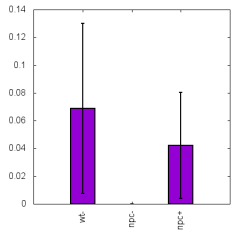

766: m/z= 2172.8437  
(Hex)1 (HexNAc)1 (Fuc)1 (NeuGc)1 +  
(Man)3(GlcNAc)2

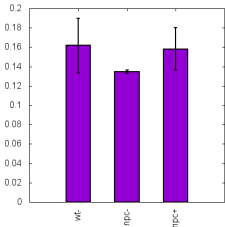

767: m/z= 2172.8437  
(Hex)1 (HexNAc)2 (Fuc)1 (NeuGc)1 +  
(Man)3(GlcNAc)1

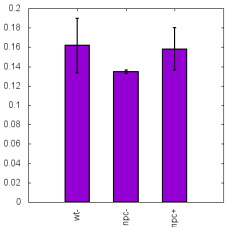

1757: m/z= 1178.5130  
(HexNAc)1 + (Man)2(GlcNAc)1

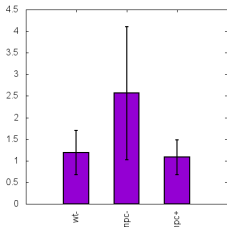

1759: m/z= 1137.4865  
(Hex)1 + (Man)2(GlcNAc)1

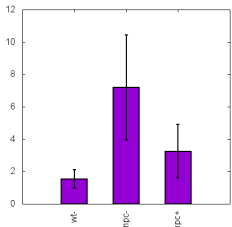

1760: m/z= 1340.5838  
(Hex)1 + (Man)2(GlcNAc)2

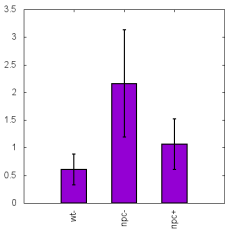

1761: m/z= 1340.5658  
(Hex)1 (HexNAc)1 + (Man)2(GlcNAc)1

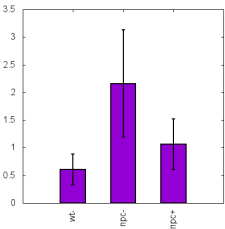

1762: m/z= 1543.6631  
(Hex)1 (HexNAc)1 + (Man)2(GlcNAc)2

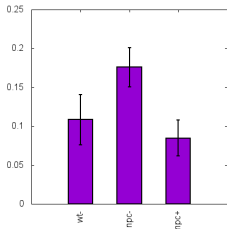

1767: m/z= 1645.6768  
(Hex)1 (HexNAc)1 (NeuAc)1 + (Man)2(GlcNAc)1

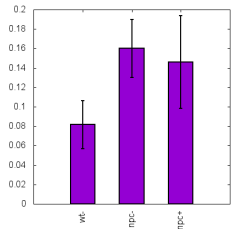

Supplement: s1 [file s1]
