# Supplementary material for: Toolbox Accelerating Glycomics (TAG): Glycan Annotation from MALDI-TOF MS Spectra and Mapping Expression Variation to Biosynthetic Pathways
Source: MDPI journal article supplement (doi:10.3390/biom10101383), 2020-09-28

MALDI-TOF MS spectrometry

Excel spread sheet as output of MS spectrometry with tabs. each tab corresponds to each experiment.

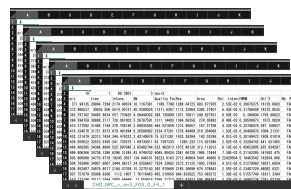

Each tab extract to a set of CSV file which added meta information to analyze the data

TAG List

database for glycan annotation

TAG Expression

- annotated glycan list
- absolute or relative quantitation of glycan
- bar chart of expression
- Statistics (average, standard deviation, etc.)
- inter-series variation of glycan expression
  - ✓ bar chart with error bars of expression
  - ✓ Student's t-test
- input file to Cluster 3.0 for hierarchical cluster analysis

Expression information mapped to glycan biosynthetic pathway

TAG Pathway

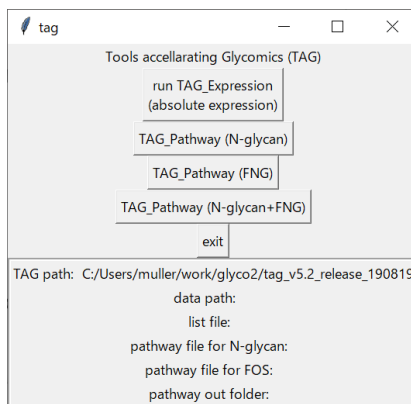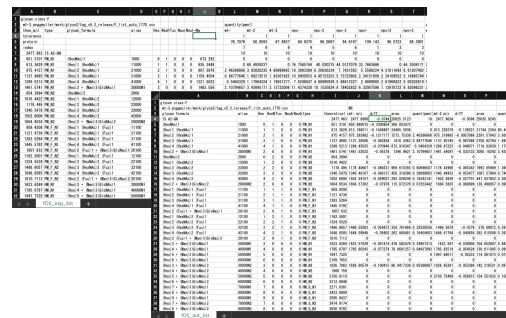

|    | A                                    | B          | C    |
|----|--------------------------------------|------------|------|
| 1  | N                                    |            |      |
| 2  | IS A2GN                              | 2477. 963  |      |
| 3  | (Hex) 1 (HexNAc) 2                   | 1016. 4422 | PM   |
| 4  | (Hex) 2 (HexNAc) 2                   | 1178. 495  | PM   |
| 5  | (Hex) 3 (HexNAc) 2                   | 1340. 5478 | PM   |
| 6  | (Hex) 4 (HexNAc) 2                   | 1502. 6006 | PM   |
| 7  | (Hex) 2 + (Man) 3 (GlcNAc) 2         | 1664. 6534 | HM   |
| 8  | (Hex) 1 (HexNAc) 2 (Fuc) 1           | 1162. 5001 | PM_F |
| 9  | (Hex) 2 (HexNAc) 2 (Fuc) 1           | 1324. 5529 | PM_F |
| 10 | (Hex) 3 (HexNAc) 2 (Fuc) 1           | 1486. 6057 | PM_F |
| 11 | (Hex) 4 (HexNAc) 2 (Fuc) 1           | 1648. 6585 | PM_F |
| 12 | (Hex) 2 (Fuc) 1 + (Man) 3 (GlcNAc) 2 | 1810. 7113 | HM_F |
| 13 | (Hex) 3 + (Man) 3 (GlcNAc) 2         | 1826. 7062 | HM   |
| 14 | (Hex) 4 + (Man) 3 (GlcNAc) 2         | 1988. 759  | HM   |
| 15 | (Hex) 5 + (Man) 3 (GlcNAc) 2         | 2150. 8118 | HM   |
| 16 | (Hex) 6 + (Man) 3 (GlcNAc) 2         | 2312. 8646 | HM   |
| 17 | (Hex) 7 + (Man) 3 (GlcNAc) 2         | 2474. 9174 | HM_G |
| 18 | (Hex) 8 + (Man) 3 (GlcNAc) 2         | 2636. 9702 | HM_G |
| 19 | (Hex) 9 + (Man) 3 (GlcNAc) 2         | 2799. 023  | HM_G |
| 20 | (HexNAc) 1 + (Man) 3 (GlcNAc) 2      | 1543. 6271 | 1_n  |

|    | A                                    | B          | C       |
|----|--------------------------------------|------------|---------|
| 1  | F                                    |            |         |
| 2  | IS A2GN                              | 2477. 963  |         |
| 3  | (HexNAc) 1                           | 651. 3101  | PM_N1   |
| 4  | (Hex) 1 (HexNAc) 1                   | 813. 3629  | PM_N1   |
| 5  | (Hex) 2 (HexNAc) 1                   | 975. 4157  | PM_N1   |
| 6  | (Hex) 3 (HexNAc) 1                   | 1137. 4685 | PM_N1   |
| 7  | (Hex) 4 (HexNAc) 1                   | 1299. 5213 | PM_N1   |
| 8  | (Hex) 2 + (Man) 3 (GlcNAc) 1         | 1461. 5741 | HM_N1   |
| 9  | (HexNAc) 2                           | 854. 3894  | PM_N2   |
| 10 | (Hex) 1 (HexNAc) 2                   | 1016. 4422 | PM_N2   |
| 11 | (Hex) 2 (HexNAc) 2                   | 1178. 495  | PM_N2   |
| 12 | (Hex) 3 (HexNAc) 2                   | 1340. 5478 | PM_N2   |
| 13 | (Hex) 4 (HexNAc) 2                   | 1502. 6006 | PM_N2   |
| 14 | (Hex) 2 + (Man) 3 (GlcNAc) 2         | 1664. 6534 | HM_N2   |
| 15 | (Hex) 1 (HexNAc) 1 (Fuc) 1           | 959. 4208  | PM_F_N1 |
| 16 | (Hex) 2 (HexNAc) 1 (Fuc) 1           | 1121. 4736 | PM_F_N1 |
| 17 | (Hex) 3 (HexNAc) 1 (Fuc) 1           | 1283. 5264 | PM_F_N1 |
| 18 | (Hex) 4 (HexNAc) 1 (Fuc) 1           | 1445. 5792 | PM_F_N1 |
| 19 | (Hex) 2 (Fuc) 1 + (Man) 3 (GlcNAc) 1 | 1607. 632  | HM_F_N1 |
| 20 | (Hex) 1 (HexNAc) 2 (Fuc) 1           | 1162. 5001 | PM_F_N2 |

|    | A                                                                                                                              | B          | C          | D          | E           | F          | G          | H           | I          | J          | K        | L |
|----|--------------------------------------------------------------------------------------------------------------------------------|------------|------------|------------|-------------|------------|------------|-------------|------------|------------|----------|---|
| 1  | Spectrum: CHO_WT_-_n=1_2¥0_A5¥1 1SRef Raw (¥¥tsclient¥C¥Users¥shinoken¥Desktop¥yokota¥150728_Kumamoto_N¥CHO_WT_-_n=1_2¥0_A5¥1) |            |            |            |             |            |            |             |            |            |          |   |
| 2  | 5                                                                                                                              | 2          | 17.0462    | 1          | wt-         |            |            |             |            |            |          |   |
| 3  | m/z                                                                                                                            | time       | Intens.    | SN         | Quality Fac | Res.       | Area       | Rel. Intens | FWHM       | Chi^2      | Bk. Peak |   |
| 4  | 371.933902                                                                                                                     | 29994.4312 | 1057.02446 | 9.27755578 | 901.318813  | 1354.78275 | 405.043875 | 5.52E-02    | 0.27453398 | 5074.75827 | FALSE    |   |
| 5  | 372.982979                                                                                                                     | 30036.4032 | 2835.02979 | 24.8708036 | 6241.39797  | 1216.13387 | 1164.95528 | 0.14803197  | 0.30669566 | 5314.89986 | FALSE    |   |
| 6  | 394.600625                                                                                                                     | 30888.4997 | 299.181037 | 2.57081923 | 299.967749  | 1440.81111 | 112.571559 | 1.56E-02    | 0.27387395 | 366.967776 | FALSE    |   |
| 7  | 416.322194                                                                                                                     | 31721.4686 | 277.467115 | 2.36286978 | 327.523771  | 1611.67872 | 100.802826 | 1.45E-02    | 0.25831587 | 251.538758 | FALSE    |   |
| 8  | 460.741688                                                                                                                     | 33359.6749 | 225.452088 | 1.91246743 | 72.3547795  | 936.852364 | 165.308706 | 1.18E-02    | 0.49179754 | 1130.0737  | FALSE    |   |
| 9  | 489.793767                                                                                                                     | 34388.63   | 310.761287 | 2.64422963 | 192.092042  | 971.050996 | 209.677113 | 1.62E-02    | 0.50439552 | 683.473098 | FALSE    |   |
| 10 | 499.789887                                                                                                                     | 34735.5696 | 3176.69793 | 27.0279262 | 2041.75011  | 2111.73877 | 1136.35632 | 0.16587228  | 0.23667221 | 85595.0972 | FALSE    |   |
| 11 | 500.773421                                                                                                                     | 34769.517  | 10116.6128 | 86.0650008 | 19915.4782  | 2455.84702 | 3197.13522 | 0.5282421   | 0.20391067 | 105438.148 | FALSE    |   |
| 12 | 503.003213                                                                                                                     | 34846.3568 | 2165.55108 | 18.4239271 | 250.215585  | 1991.42365 | 718.312988 | 0.11307493  | 0.25258473 | 68322.4512 | FALSE    |   |
| 13 | 503.97475                                                                                                                      | 34879.783  | 6239.2702  | 52.9718087 | 2981.18338  | 2451.24087 | 1738.71648 | 0.32578544  | 0.20559985 | 49965.9673 | FALSE    |   |
| 14 | 504.771905                                                                                                                     | 34907.1856 | 2151.39822 | 18.2967291 | 1122.92348  | 2360.26603 | 655.477557 | 0.11233593  | 0.21386229 | 16352.2451 | FALSE    |   |
| 15 | 505.895025                                                                                                                     | 34945.7565 | 401.850572 | 3.41974498 | 92.5747716  | 1181.94944 | 225.88703  | 2.10E-02    | 0.42801748 | 7222.5017  | FALSE    |   |
| 16 | 506.797358                                                                                                                     | 34976.714  | 3667.92051 | 31.1975458 | 5660.674    | 2203.85002 | 1160.5866  | 0.19152162  | 0.22996    | 7980.41949 | FALSE    |   |
| 17 | 507.727927                                                                                                                     | 35008.6113 | 862.634885 | 7.35358755 | 1095.16542  | 956.056743 | 637.91536  | 4.50E-02    | 0.53106464 | 4419.51936 | FALSE    |   |
| 18 | 508.769903                                                                                                                     | 35044.2927 | 416.548457 | 3.53618923 | 303.926967  | 2162.77263 | 155.290449 | 2.18E-02    | 0.23523966 | 1589.01111 | FALSE    |   |
| 19 | 509.788473                                                                                                                     | 35079.1371 | 302.392296 | 2.57542386 | 64.5081078  | 1979.70745 | 112.533143 | 0.01578951  | 0.25750697 | 1901.78933 | FALSE    |   |
| 20 | 510.758895                                                                                                                     | 35112.3021 | 730.958313 | 6.2097764  | 623.15645   | 2377.25653 | 241.7814   | 3.82E-02    | 0.21485224 | 2195.08722 | FALSE    |   |
| 21 | 511.757616                                                                                                                     | 35146.4013 | 1015.05373 | 8.63497846 | 926.845481  | 2861.32574 | 279.794123 | 5.30E-02    | 0.17885332 | 2585.41625 | FALSE    |   |
| 22 | 512.845201                                                                                                                     | 35183.4967 | 518.486619 | 4.41513554 | 208.530672  | 1918.12289 | 194.179237 | 2.71E-02    | 0.26736827 | 3303.65928 | FALSE    |   |
| 23 | 516.029872                                                                                                                     | 35291.8938 | 7827.20523 | 66.666402  | 11814.1571  | 2708.37276 | 2054.9631  | 0.40869997  | 0.19053133 | 31690.1249 | FALSE    |   |
| 24 | 517.989859                                                                                                                     | 35358.4397 | 1757.78865 | 14.9710105 | 322.745419  | 2928.50692 | 432.346579 | 9.18E-02    | 0.17687848 | 34410.5263 | FALSE    |   |

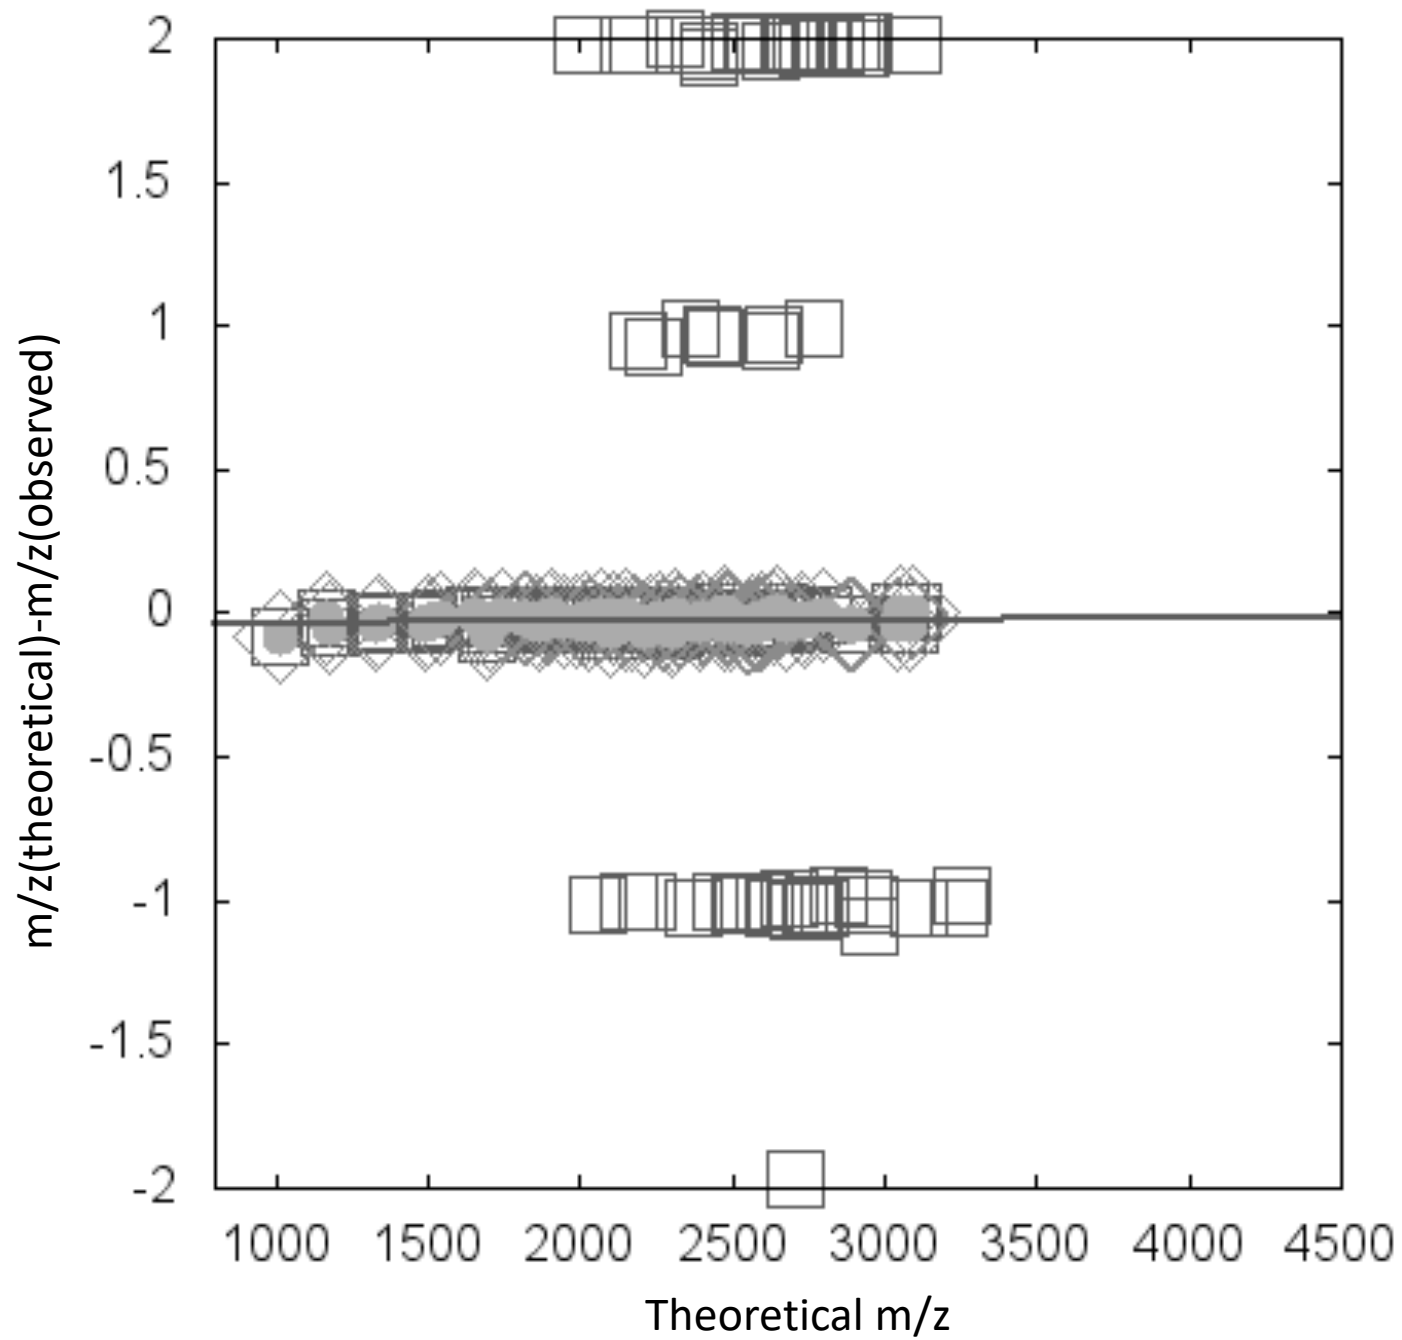

|    | BR                 | BS              | BT                 | BU                 | BV                 | BW              |
|----|--------------------|-----------------|--------------------|--------------------|--------------------|-----------------|
| 38 | ./glyco_img/ra.png |                 | ./glyco_img/ra.png |                    | ./glyco_img/ra.png |                 |
| 39 |                    | N-glycan_folded |                    | N-glycan_folded    |                    | N-glycan_folded |
| 40 |                    | HM_GN2          |                    | HM_GN2             |                    | HM_GN2          |
| 41 |                    | 50000C          |                    | 40000C             |                    | 30000C          |
| 42 |                    | Golgi and later |                    | Golgi and later    |                    | Golgi and later |
| 43 |                    |                 |                    | ./glyco_img/da.png |                    |                 |
| 44 |                    |                 |                    |                    |                    |                 |

|    | A                                                                | B      | C   | D      | E   | F     | G     | H    | I               |
|----|------------------------------------------------------------------|--------|-----|--------|-----|-------|-------|------|-----------------|
| 1  | glycan class:N                                                   |        |     |        |     |       |       |      |                 |
| 2  | wt-3.pnggmuller/work/glyco2/tag_v5.2_release/N_list_auto_877.csv |        |     |        |     |       |       |      |                 |
| 3  | glycan formula                                                   | alias  | Hex | HexNAc | Fuc | NeuAc | NeuGc | type | theoretical m/z |
| 4  | IS A2-GN                                                         |        |     |        |     |       |       |      | 2477.963        |
| 5  | (Hex) 1 (HexNAc) 2                                               | 12000  | 1   | 2      | 0   | 0     | 0     | PM   | 1016.4422       |
| 6  | (Hex) 2 (HexNAc) 2                                               | 22000  | 2   | 2      | 0   | 0     | 0     | PM   | 1178.495        |
| 7  | (Hex) 3 (HexNAc) 2                                               | 32000  | 3   | 2      | 0   | 0     | 0     | PM   | 1340.5478       |
| 8  | (Hex) 4 (HexNAc) 2                                               | 42000  | 4   | 2      | 0   | 0     | 0     | PM   | 1502.6006       |
| 9  | (Hex) 2 + (Man) 3 (GlcNAc) 2                                     | 20000C | 2   | 0      | 0   | 0     | 0     | HM   | 1664.6534       |
| 10 | (Hex) 1 (HexNAc) 2 (Fuc) 1                                       | 12100  | 1   | 2      | 1   | 0     | 0     | PM_F | 1162.5001       |
| 11 | (Hex) 2 (HexNAc) 2 (Fuc) 1                                       | 22100  | 2   | 2      | 1   | 0     | 0     | PM_F | 1324.5529       |
| 12 | (Hex) 3 (HexNAc) 2 (Fuc) 1                                       | 32100  | 3   | 2      | 1   | 0     | 0     | PM_F | 1486.6057       |

glycan structure

five-digit notation

the number of monosaccharide  
residue

type of glycan in table S1/S2

theoretical m/z

| J       | K       | L        | M            | N        | O       | P        | Q            |
|---------|---------|----------|--------------|----------|---------|----------|--------------|
| MS      |         |          |              |          |         |          |              |
| wt- m/z | diff    | area     | quant (pmol) | wt-2 m/z | diff    | area     | quant (pmol) |
| 2477.93 | -0.0303 | 22113.89 | 5.0000       | 2477.97  | 0.0069  | 15451.19 | 5.0000       |
| 0.00    | 0.0000  | 0.00     | 0.0000       | 0.00     | 0.0000  | 0.00     | 0.0000       |
| 1178.45 | -0.0435 | 1387.11  | 1.8399       | 1178.46  | -0.0302 | 895.51   | 2.2934       |
| 1340.52 | -0.0251 | 1820.17  | 2.4143       | 1340.54  | -0.0121 | 1087.16  | 2.7843       |
| 1502.58 | -0.0179 | 1325.65  | 1.7583       | 1502.60  | -0.0033 | 798.54   | 2.0451       |
| 1664.65 | -0.0032 | 6892.52  | 9.1423       | 1664.67  | 0.0121  | 3939.24  | 10.0886      |
| 1162.42 | -0.0771 | 108.89   | 0.1444       | 1162.46  | -0.0359 | 106.23   | 0.2721       |
| 1324.53 | -0.0273 | 3971.36  | 5.2676       | 1324.54  | -0.0087 | 2877.42  | 7.3692       |
| 1486.59 | -0.0169 | 734.42   | 0.9741       | 1486.58  | -0.0209 | 405.66   | 1.0389       |

anotation information (see text)

anotation information (see text) ...

|    | A                                                             | B    | C                         | D      | E   | F      | G   | H     | I     | J               |
|----|---------------------------------------------------------------|------|---------------------------|--------|-----|--------|-----|-------|-------|-----------------|
| 1  | glycan class:N                                                |      |                           |        |     |        |     |       |       |                 |
| 2  | wt-3.pnggmüller/work/glyco2/tag_v5.2_release/N_list_877_L.csv |      |                           |        |     |        |     |       |       |                 |
| 3  | th m/z                                                        | type | glycan formula            | alias  | Hex | HexNAc | Fuc | NeuAc | NeuGc | m/z (Na adduct) |
| 4  | tolerance                                                     |      |                           |        |     |        |     |       |       |                 |
| 5  | protein                                                       |      |                           |        |     |        |     |       |       |                 |
| 6  | index                                                         |      |                           |        |     |        |     |       |       |                 |
| 7  | 2477.963 IS A2-GN                                             |      |                           |        |     |        |     |       |       |                 |
| 8  | 1178.495 PM                                                   |      | (Hex)2 (HexNAc)2          | 22000  | 2   | 2      | 0   | 0     | 0     | 1200.4769       |
| 9  | 1340.5478 PM                                                  |      | (Hex)3 (HexNAc)2          | 32000  | 3   | 2      | 0   | 0     | 0     | 1362.5297       |
| 10 | 1502.6006 PM                                                  |      | (Hex)4 (HexNAc)2          | 42000  | 4   | 2      | 0   | 0     | 0     | 1524.5825       |
| 11 | 1664.6534 HM                                                  |      | (Hex)2 + (Man)3 (GlcNAc)2 | 20000C | 2   | 0      | 0   | 0     | 0     | 1686.6353       |
| 12 | 1162.5001 PM_F                                                |      | (Hex)1 (HexNAc)2 (Fuc)1   | 12100  | 1   | 2      | 1   | 0     | 0     | 1184.482        |
| 13 | 1324.5529 PM_F                                                |      | (Hex)2 (HexNAc)2 (Fuc)1   | 22100  | 2   | 2      | 1   | 0     | 0     | 1346.5348       |

theoretical m/z

glycan structure

five-digit notation

the number of monosaccharide residue

m/z of Sodium adducted ion

| L               | M       | N       | O       | P       | Q       | R       | S       | T       | U       | V       | W       |
|-----------------|---------|---------|---------|---------|---------|---------|---------|---------|---------|---------|---------|
| quantity (pmol) |         |         |         |         |         |         |         |         | average |         |         |
| wt-             | wt-2    | wt-3    | NPC-    | NPC-2   | NPC-3   | NPC+    | NPC+2   | NPC+3   | wt-     | NPC-    | NPC+    |
| 2.0000          | 2.0000  | 2.0000  | 2.0000  | 2.0000  | 2.0000  | 2.0000  | 2.0000  | 2.0000  |         |         |         |
| 17.0462         | 12.6354 | 15.1097 | 18.8750 | 21.7797 | 21.0266 | 24.2540 | 21.3494 | 19.1978 |         |         |         |
| 7.0000          | 8.0000  | 9.0000  | 4.0000  | 5.0000  | 6.0000  | 1.0000  | 2.0000  | 3.0000  |         |         |         |
| 5.0000          | 5.0000  | 5.0000  | 5.0000  | 5.0000  | 5.0000  | 5.0000  | 5.0000  | 5.0000  |         |         |         |
| 1.8399          | 2.2934  | 1.7380  | 0.7809  | 1.7774  | 1.1562  | 0.8082  | 0.8084  | 0.7958  | 1.9571  | 1.2381  | 0.8041  |
| 2.4143          | 2.7843  | 2.4335  | 2.6549  | 4.8486  | 3.4934  | 3.8115  | 2.9492  | 3.0561  | 2.5440  | 3.6656  | 3.2723  |
| 1.7583          | 2.0451  | 1.9872  | 2.4716  | 3.4706  | 2.7488  | 2.8371  | 2.8693  | 2.4514  | 1.9302  | 2.8970  | 2.7193  |
| 9.1423          | 10.0886 | 9.6376  | 14.3126 | 18.3621 | 15.3609 | 18.4086 | 19.4861 | 16.3759 | 9.6228  | 16.0119 | 18.0902 |
| 0.1444          | 0.2721  | 0.0000  | 0.0000  | 0.0000  | 0.0000  | 0.0000  | 0.0000  | 0.0000  | 0.1388  | 0.0000  | 0.0000  |
| 5.2676          | 7.3692  | 5.6320  | 3.9402  | 9.8788  | 7.1982  | 6.2105  | 4.6840  | 4.8444  | 6.0896  | 7.0057  | 5.2463  |

expression amount of each experiment

average expression of each series

| X      | Y      | Z      | AA      | AB      | AC      | AD         | AE         | AF          | AG         | AH         | AI          |
|--------|--------|--------|---------|---------|---------|------------|------------|-------------|------------|------------|-------------|
| std    |        |        | cv      |         |         | t-value    |            |             | p-value    |            |             |
| wt-    | NPC-   | NPC+   | wt-     | NPC-    | NPC+    | wt- - NPC- | wt- - NPC+ | NPC- - NPC+ | wt- - NPC- | wt- - NPC+ | NPC- - NPC+ |
|        |        |        |         |         |         |            |            |             |            |            |             |
|        |        |        |         |         |         |            |            |             |            |            |             |
|        |        |        |         |         |         |            |            |             |            |            |             |
| 0.2957 | 0.5033 | 0.0072 | 15.1081 | 40.6477 | 0.8949  | 2.1334     | 6.7520     | 1.4935      | 0.0998     | 0.0025     | 0.2096      |
| 0.2083 | 1.1070 | 0.4700 | 8.1869  | 30.1983 | 14.3638 | 1.7247     | 2.4535     | 0.5665      | 0.1597     | 0.0702     | 0.6013      |
| 0.1516 | 0.5157 | 0.2326 | 7.8557  | 17.8013 | 8.5522  | 3.1152     | 4.9228     | 0.5441      | 0.0357     | 0.0079     | 0.6153      |
| 0.4733 | 2.1018 | 1.5793 | 4.9188  | 13.1263 | 8.7304  | 5.1365     | 8.8952     | 1.3692      | 0.0068     | 0.0009     | 0.2428      |
| 0.1361 | 0.0000 | 0.0000 | 98.0427 | 0.0000  | 0.0000  | 1.7666     | 1.7666     | 0.0000      | 0.1520     | 0.1520     | 1.0000      |
| 1.1230 | 2.9740 | 0.8388 | 18.4420 | 42.4506 | 15.9891 | 0.4991     | 1.0420     | 0.9862      | 0.6439     | 0.3562     | 0.3799      |

standard deviations

CVs

t-values and p-values of t-test between all possible combination

11: m/z= 1502.6006  
(Hex)4 (HexNAc)2

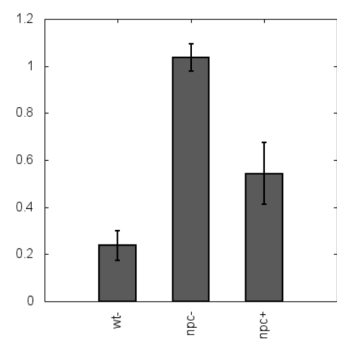

12: m/z= 1664.6534  
(Hex)2 + (Man)3(GlcNAc)2

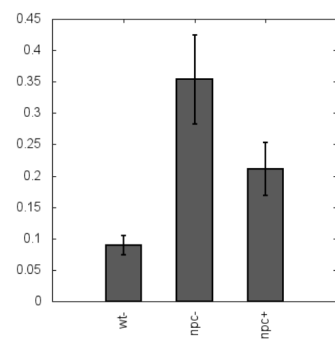

20: m/z= 1486.6057  
(Hex)3 (HexNAc)2 (Fuc)1

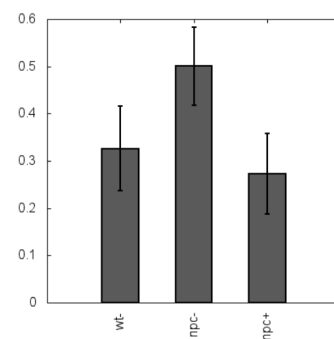

21: m/z= 1648.6585  
(Hex)4 (HexNAc)2 (Fuc)1

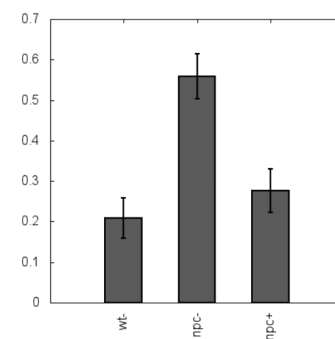

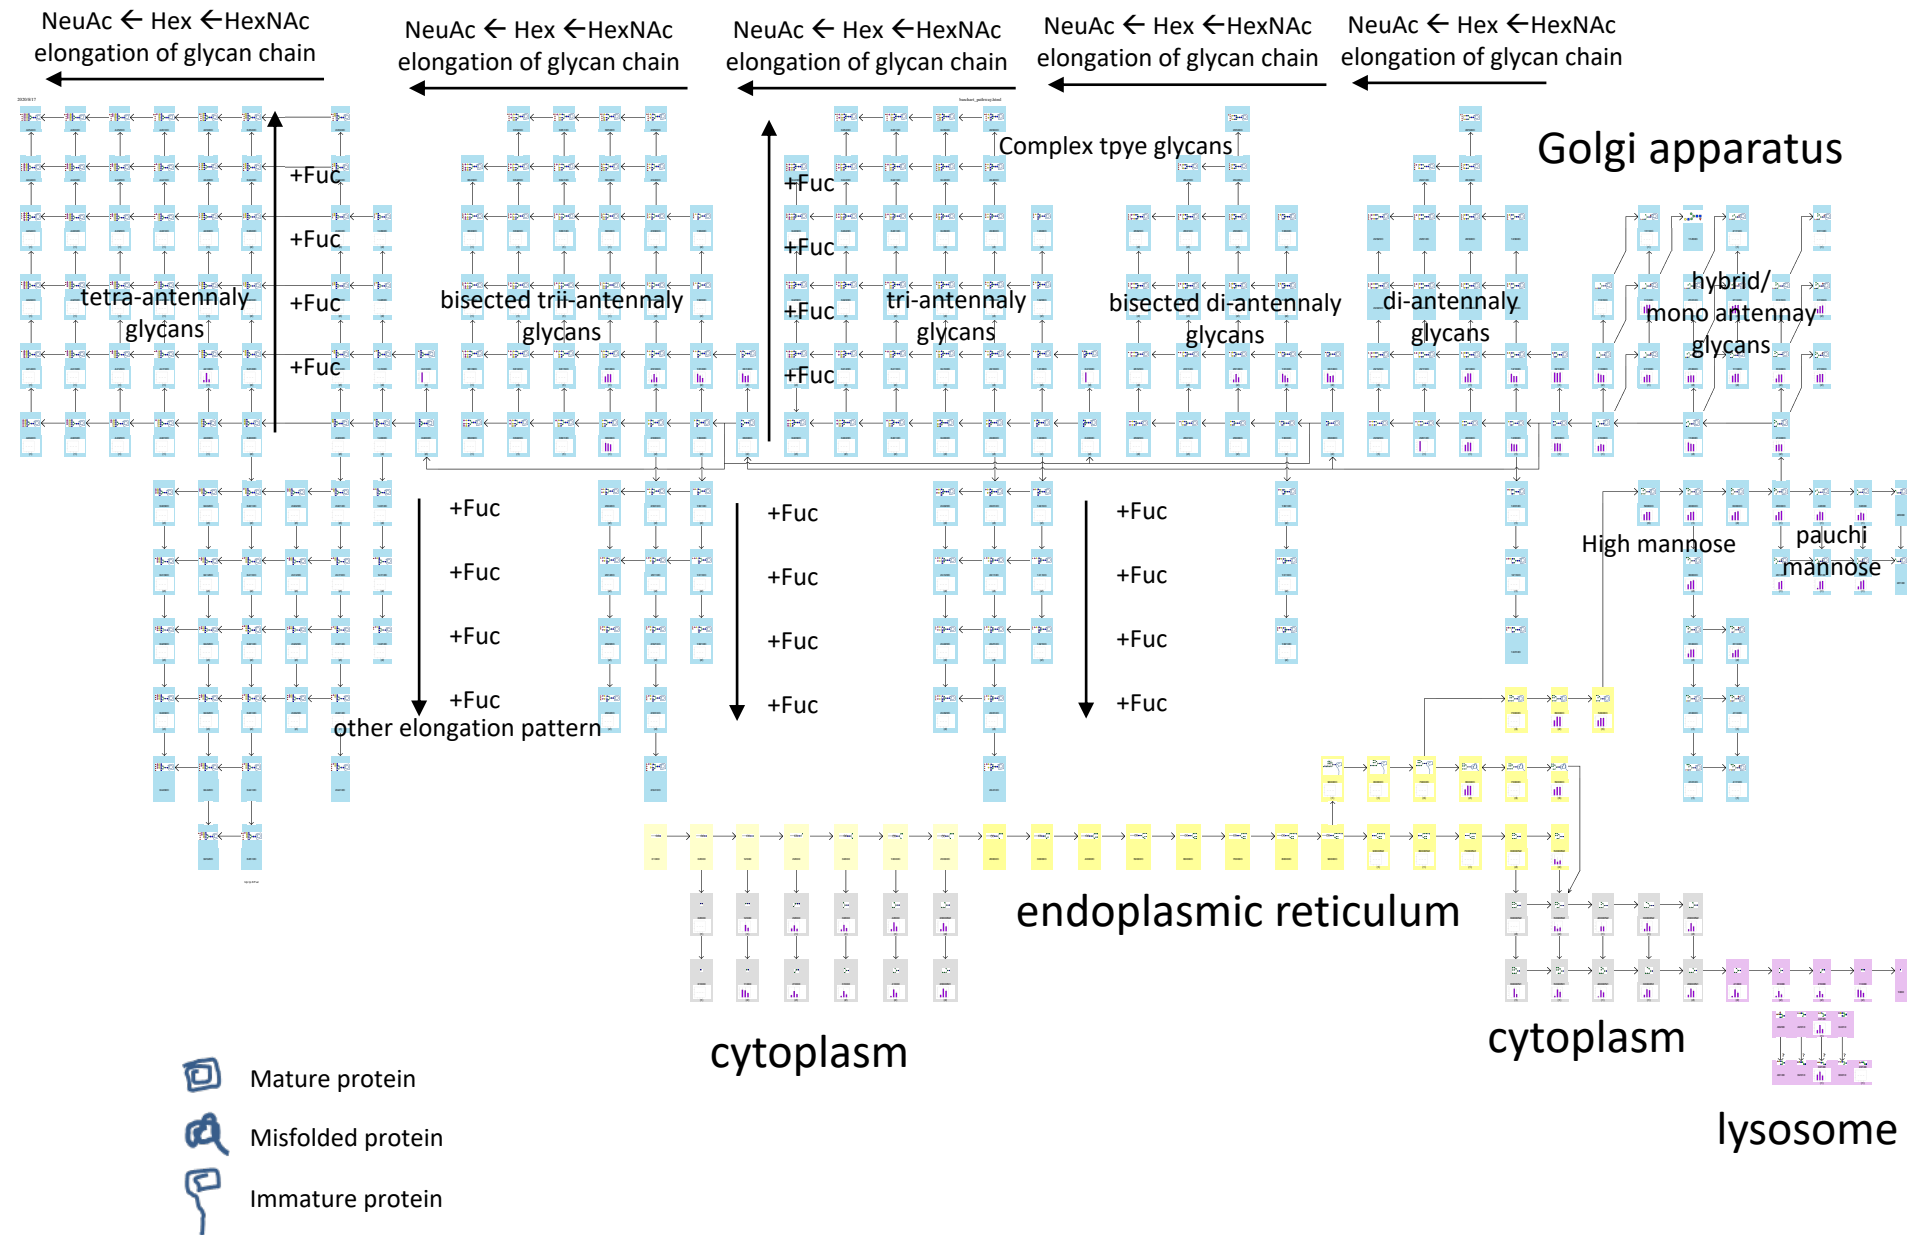

# Pathway with bar charts

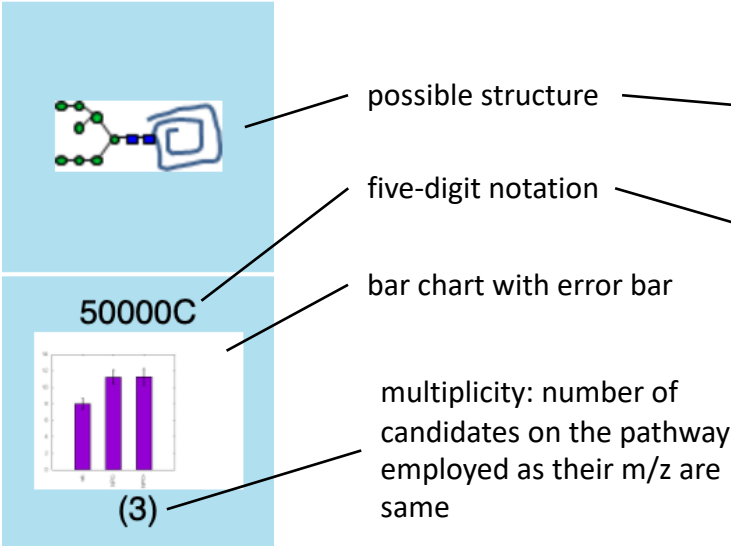

bar chart shown when the glycan is in the list and not detected

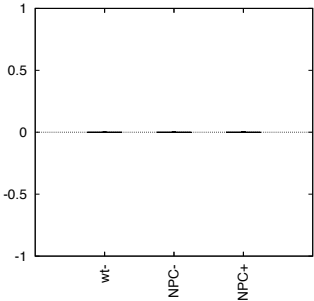

# Pathway with expression change and p-values

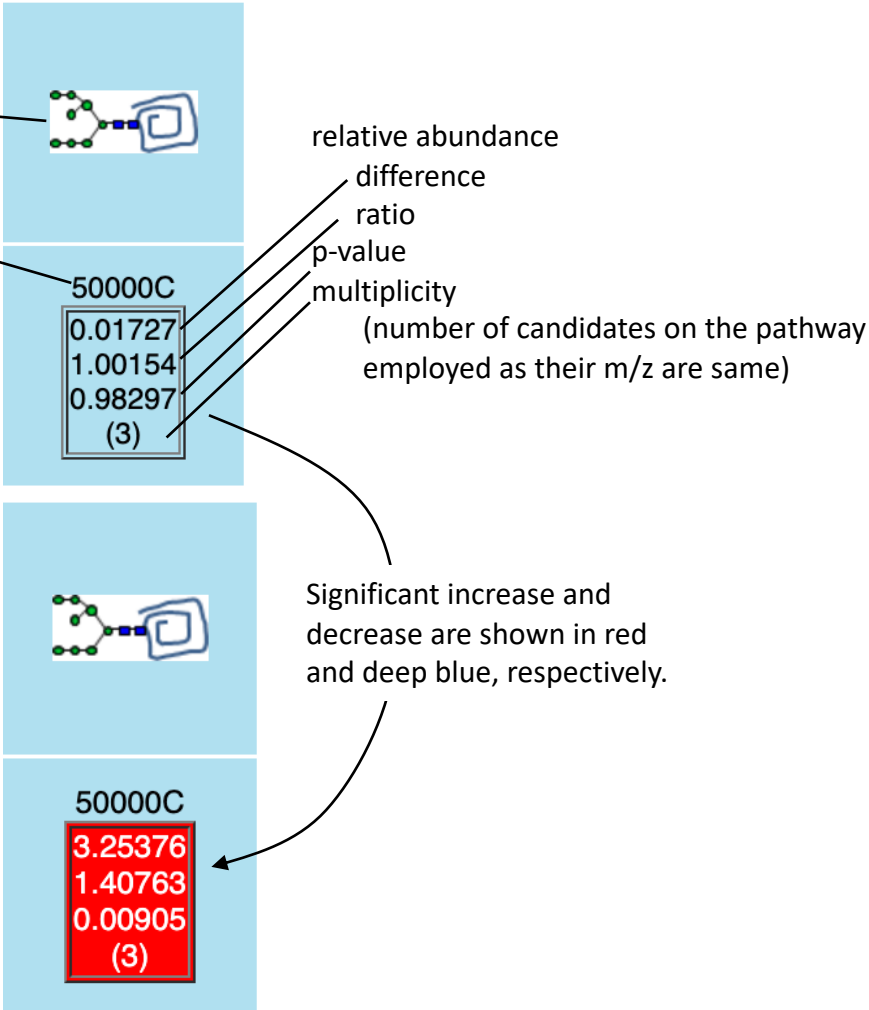

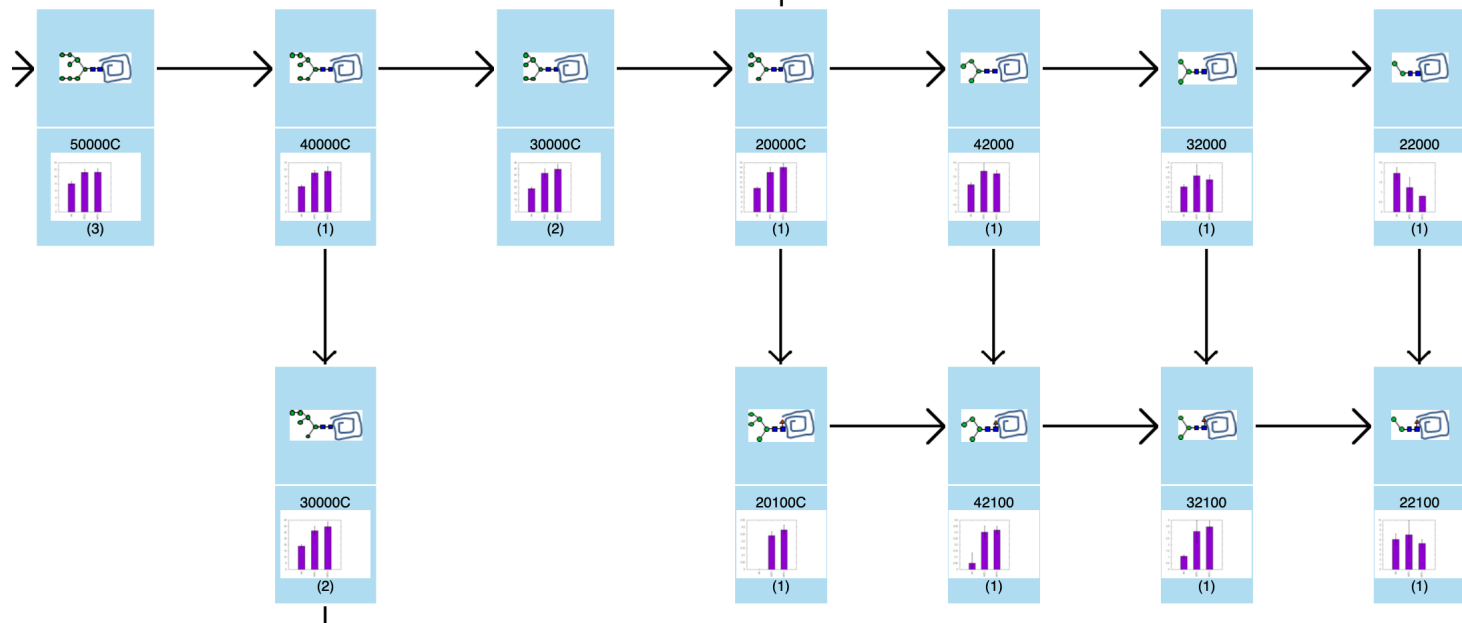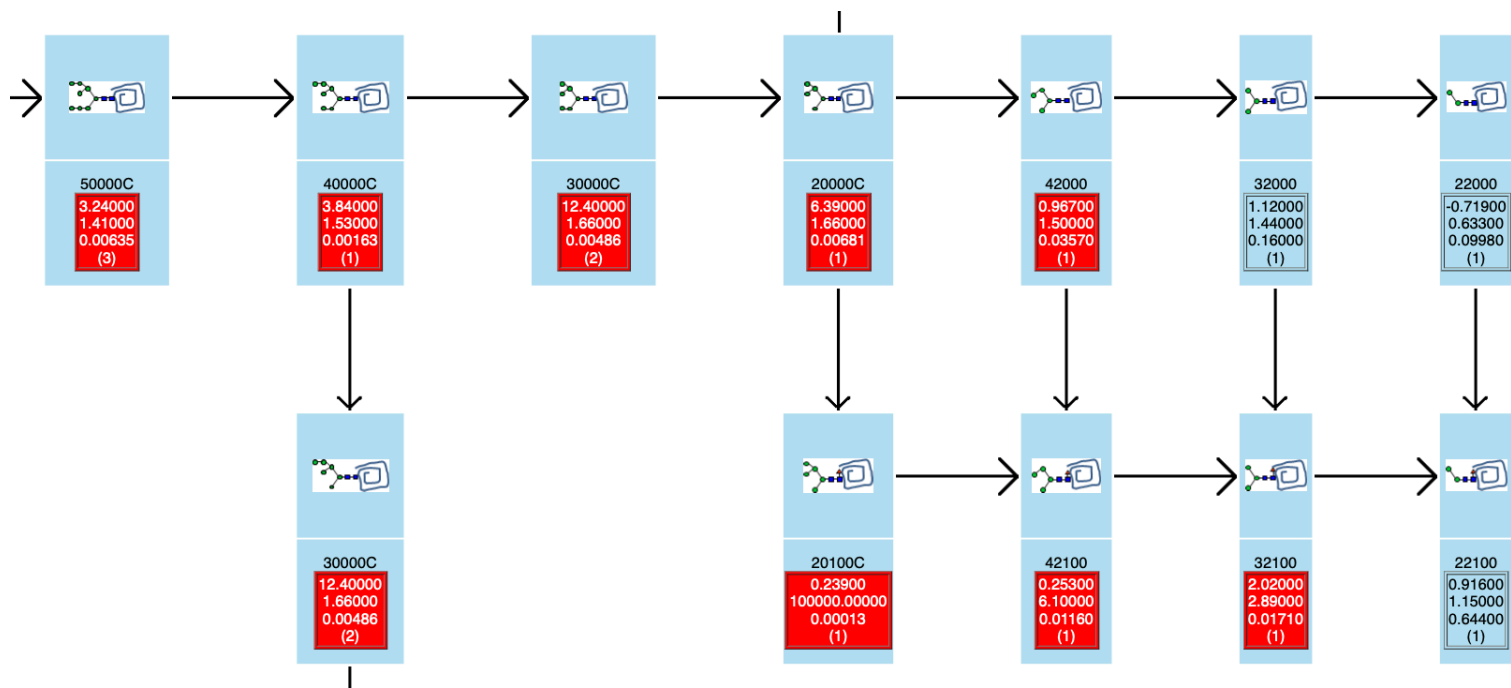

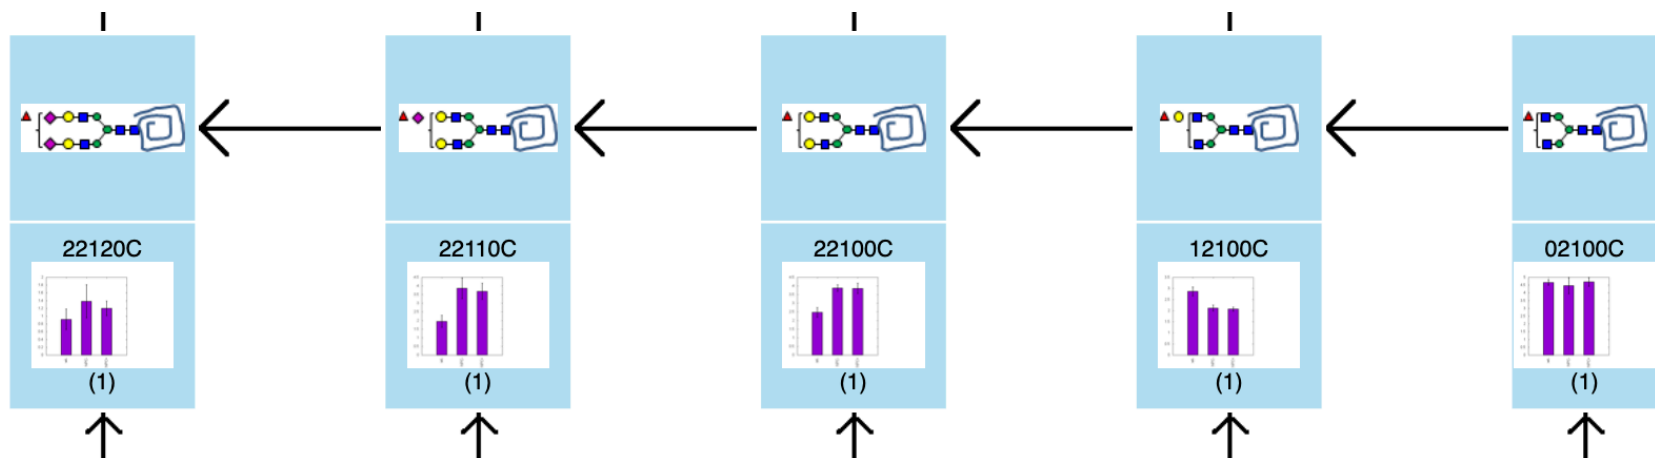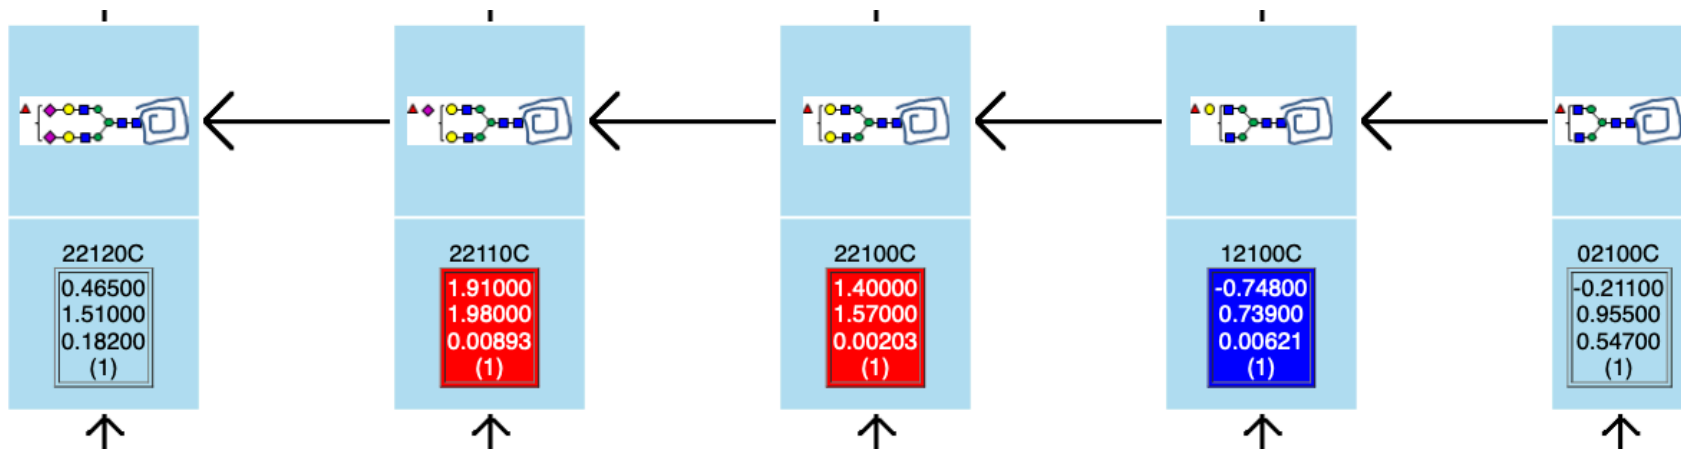

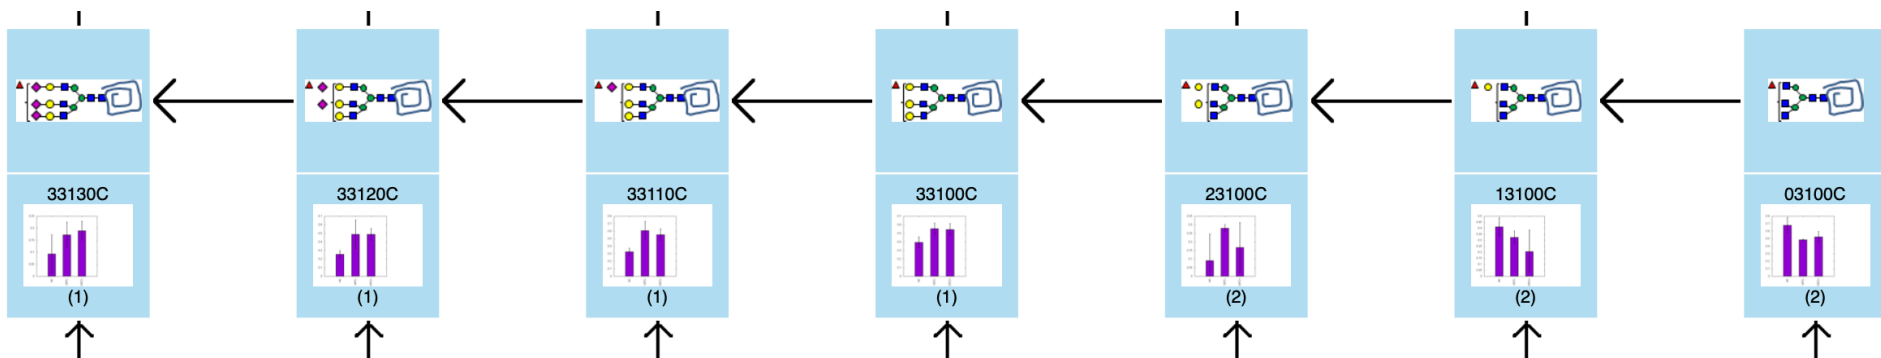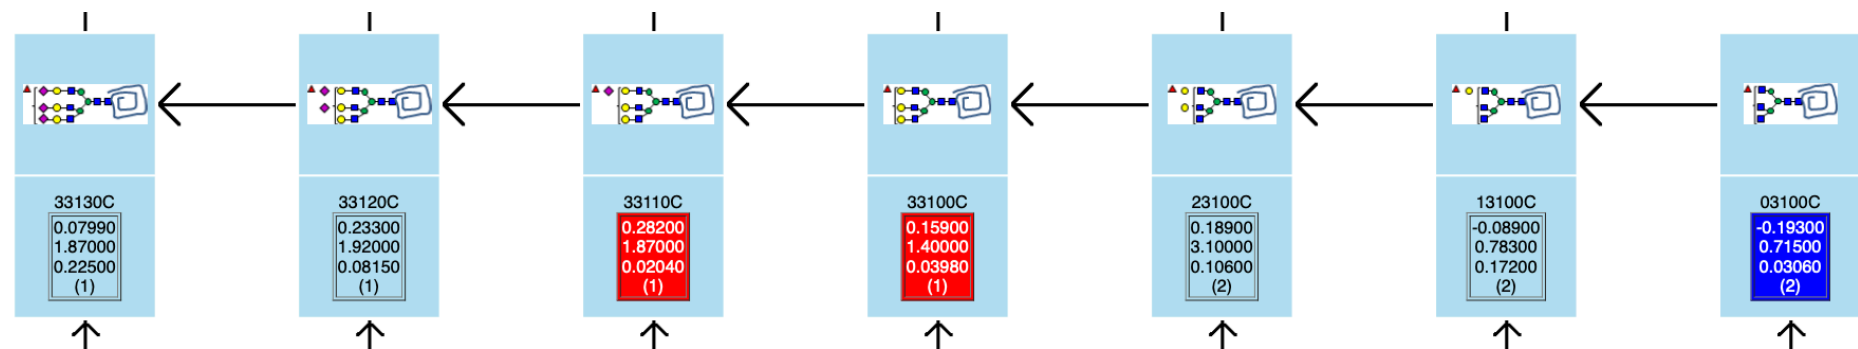

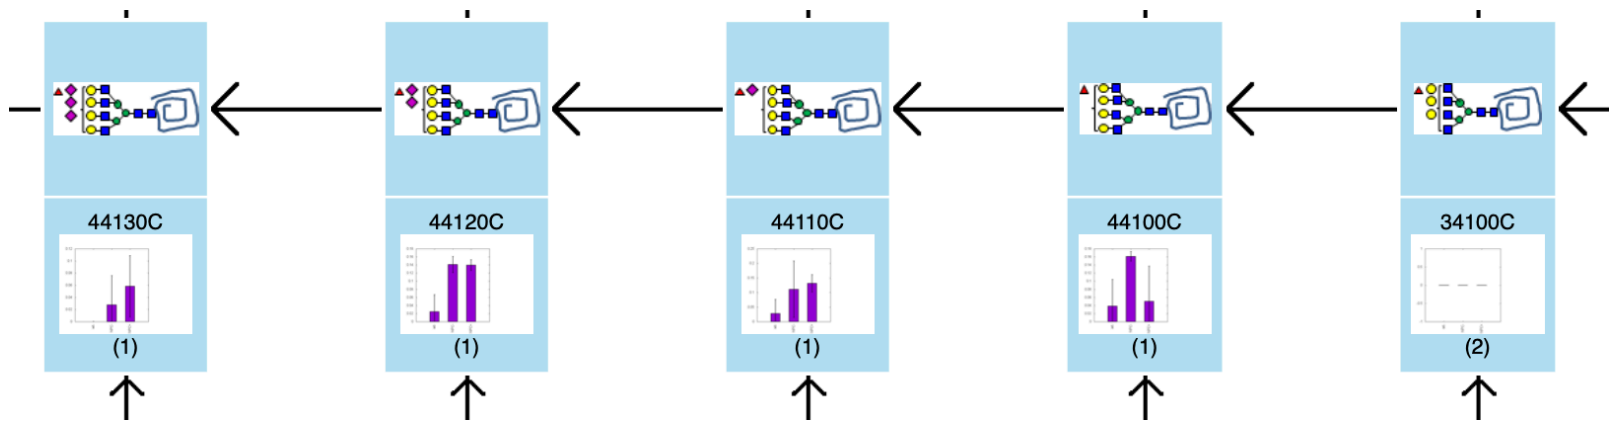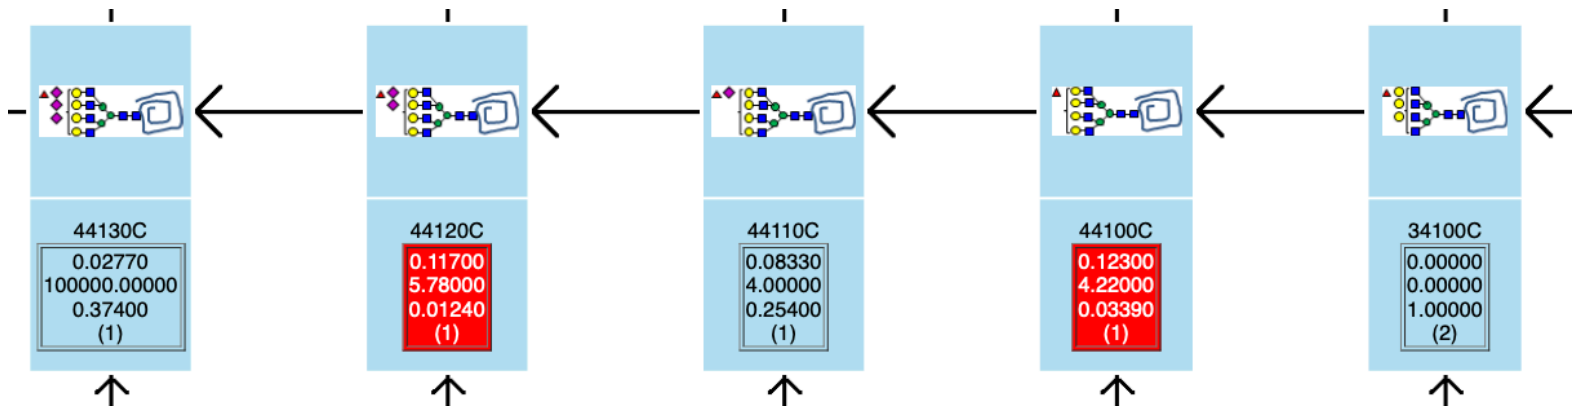

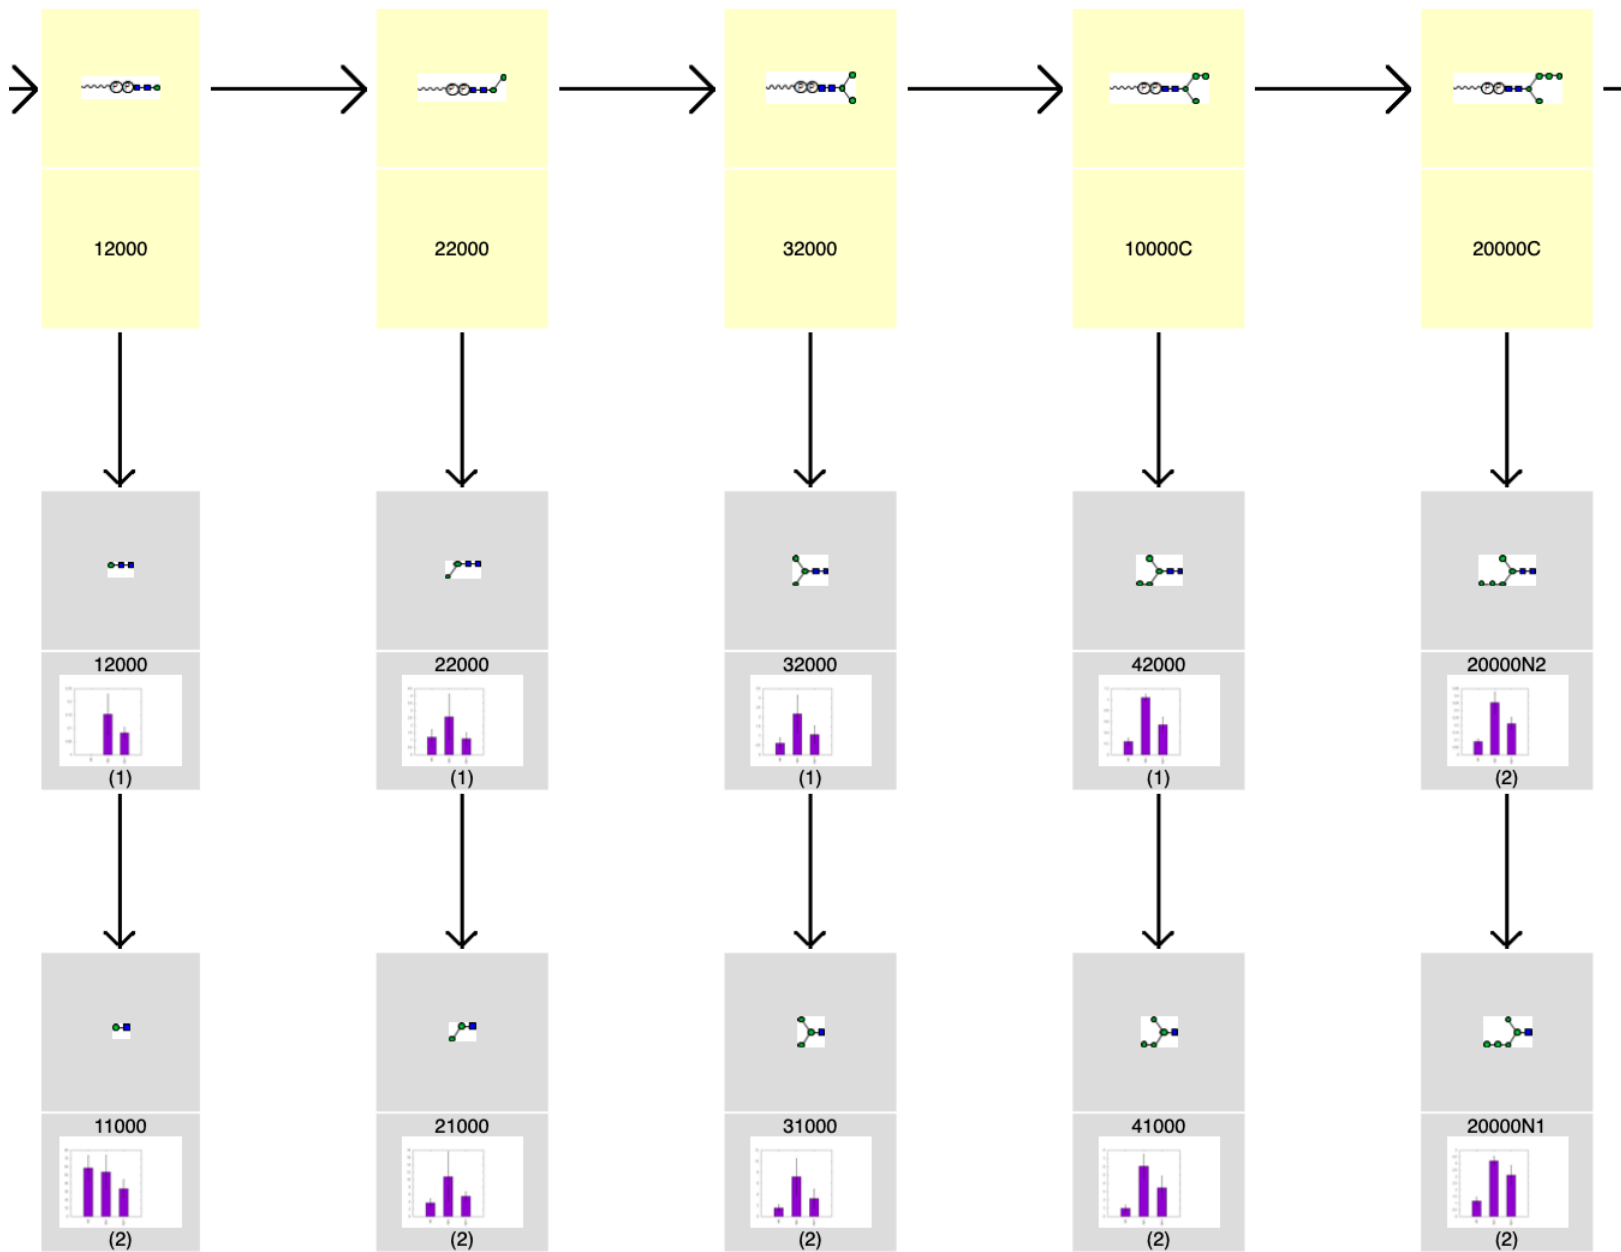

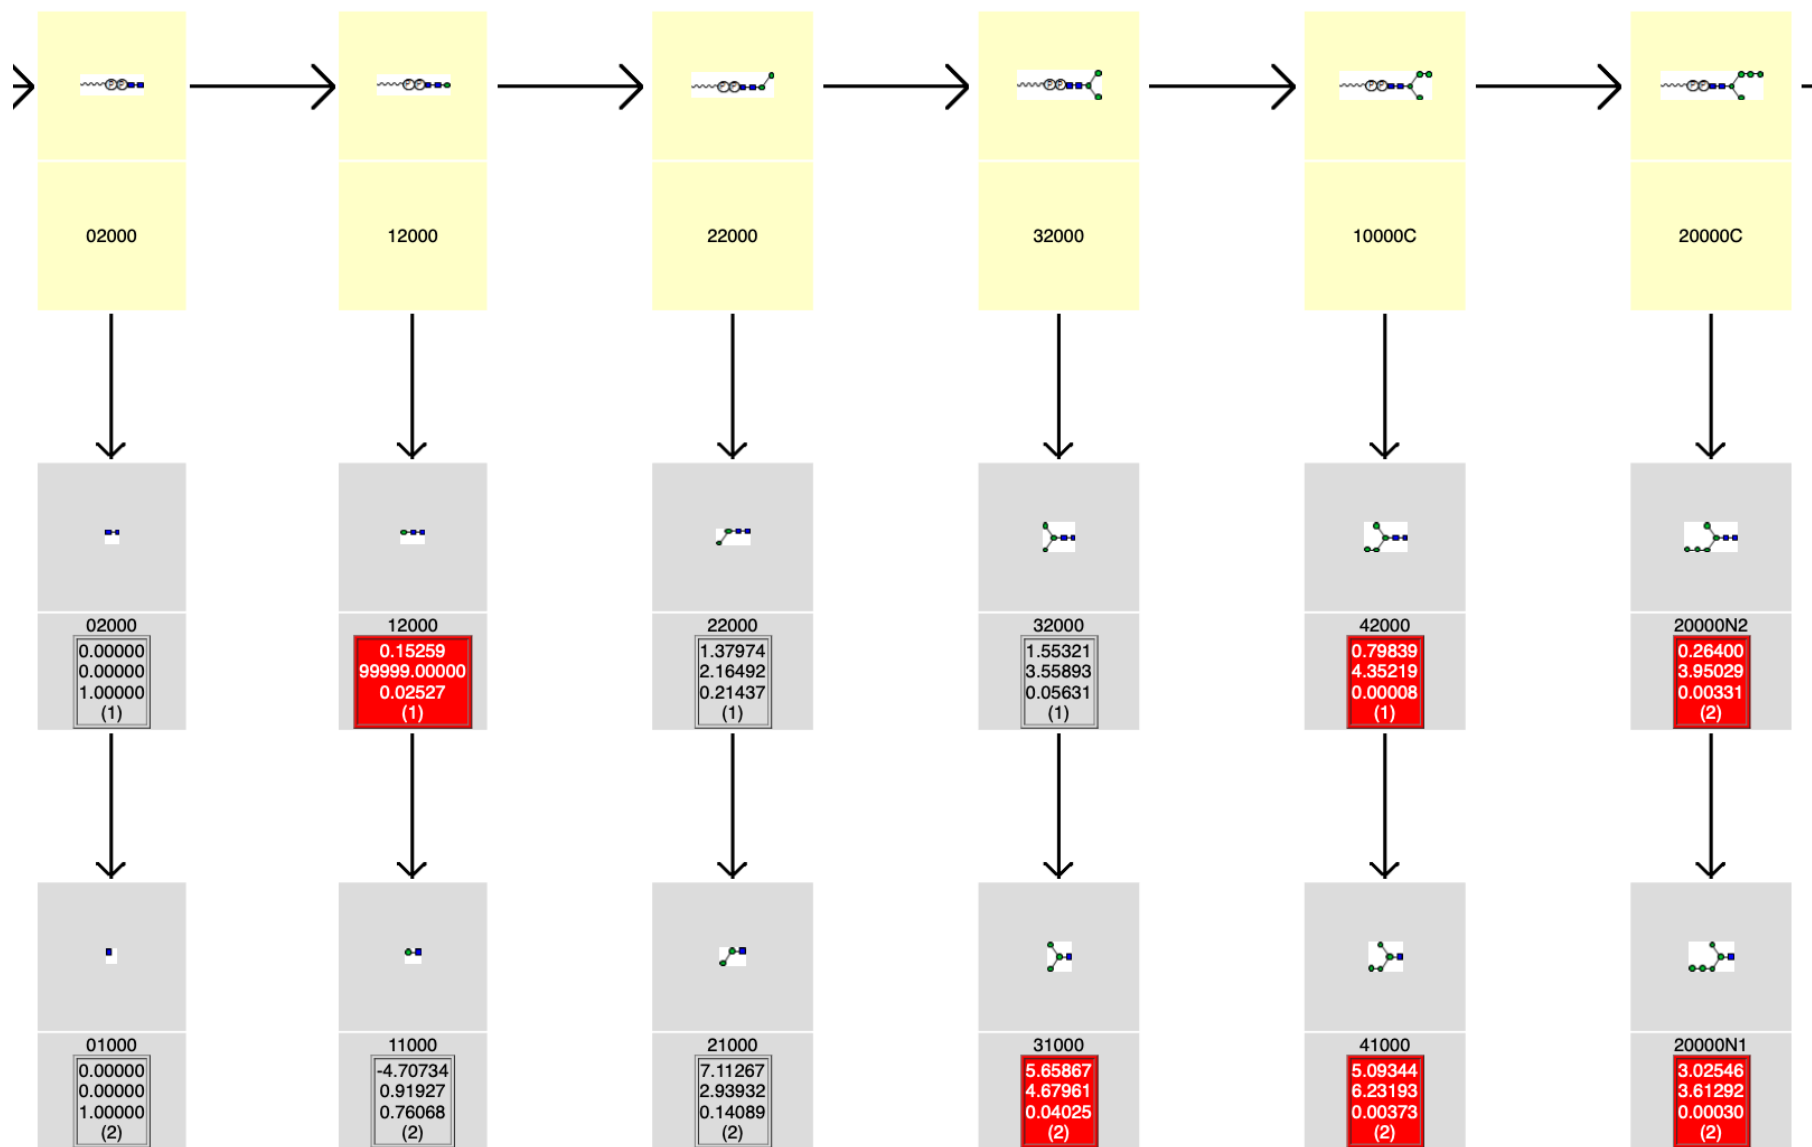

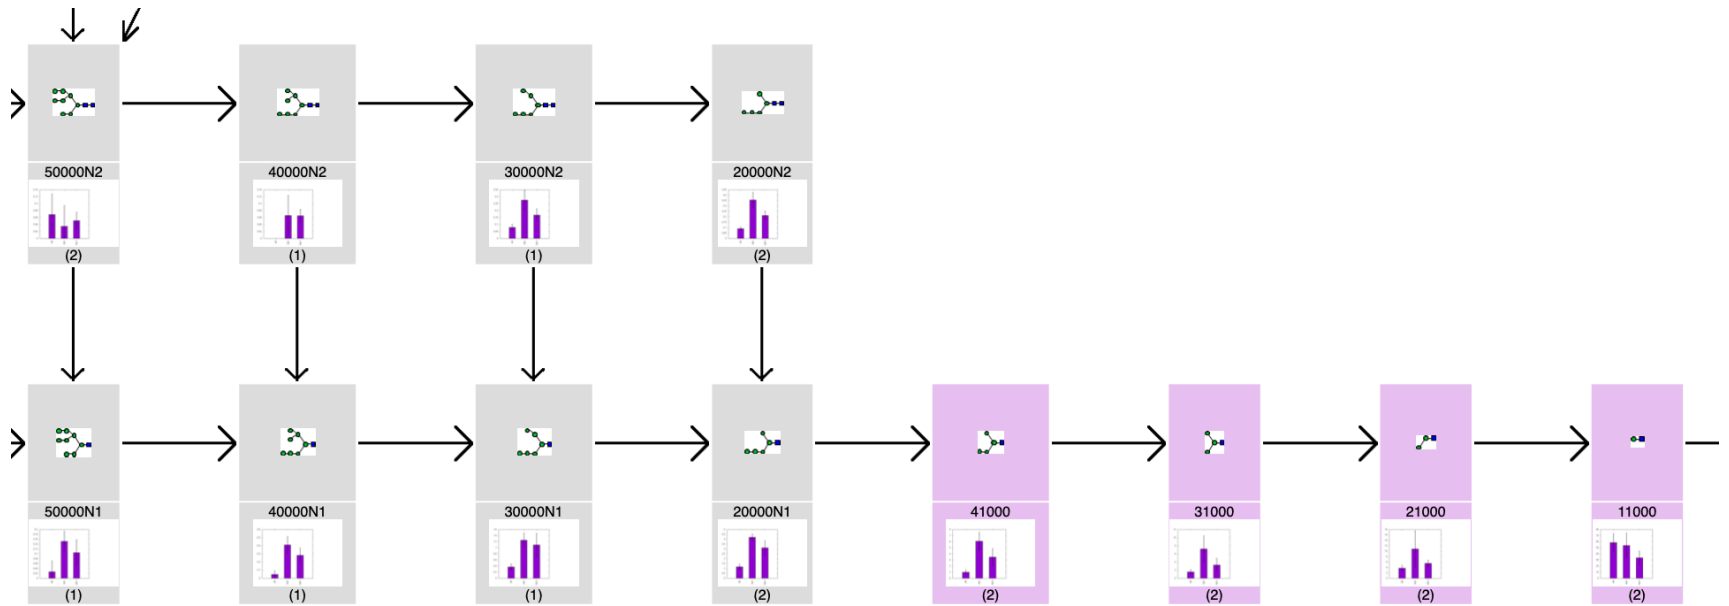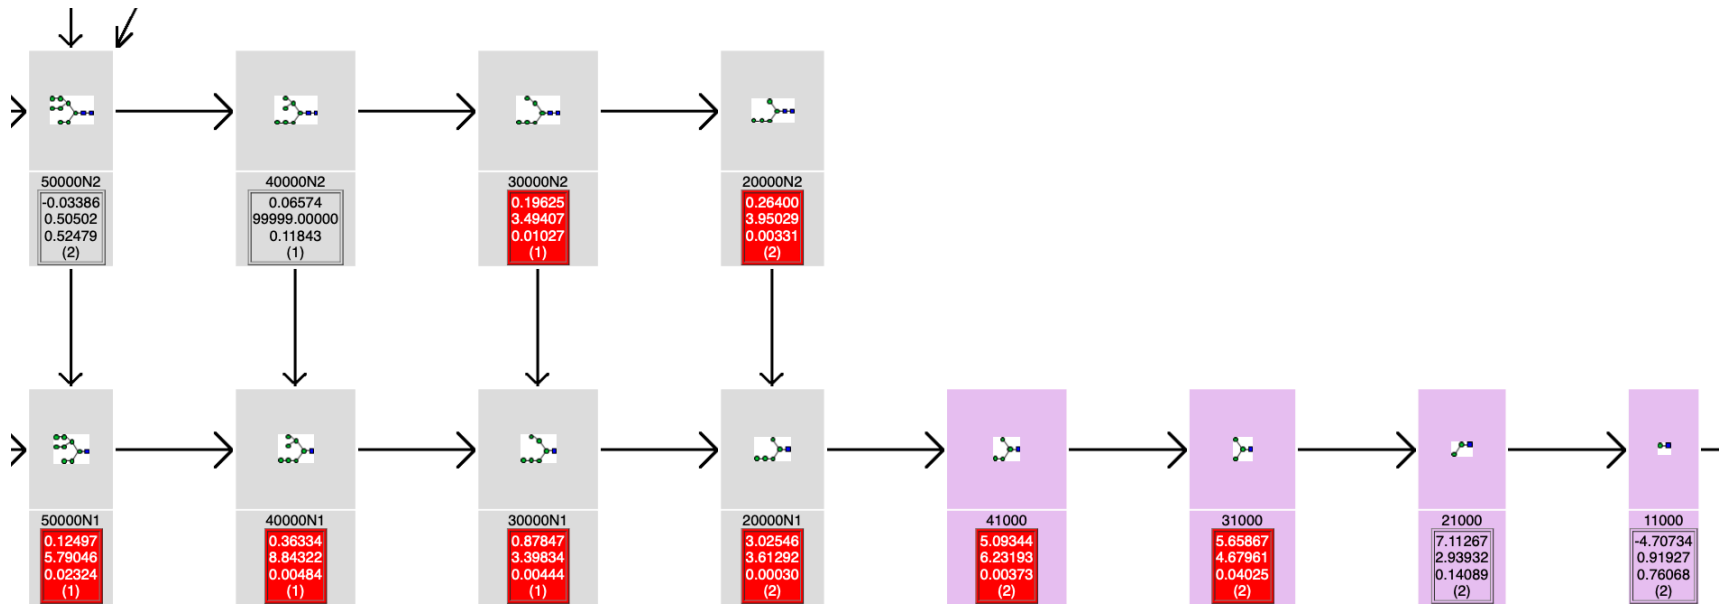

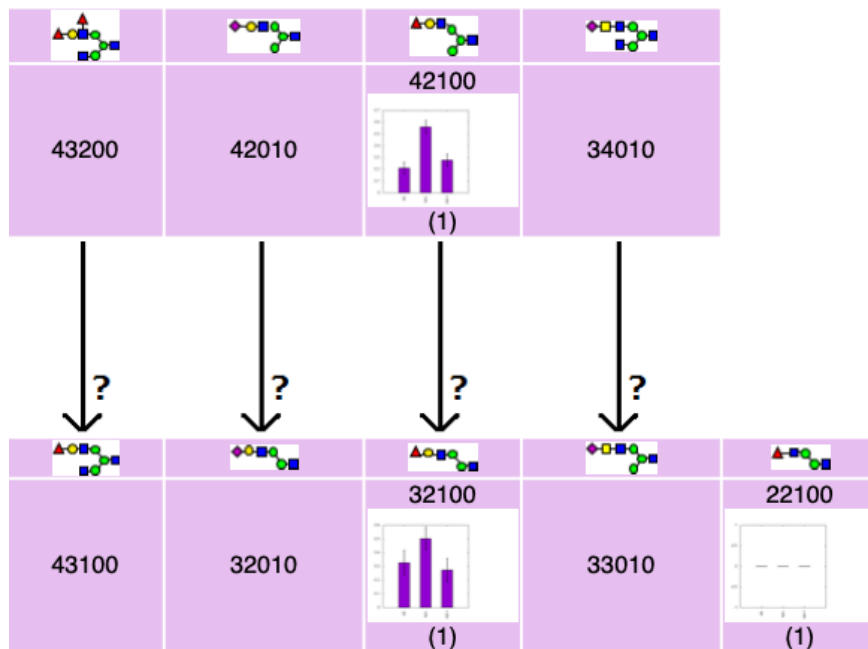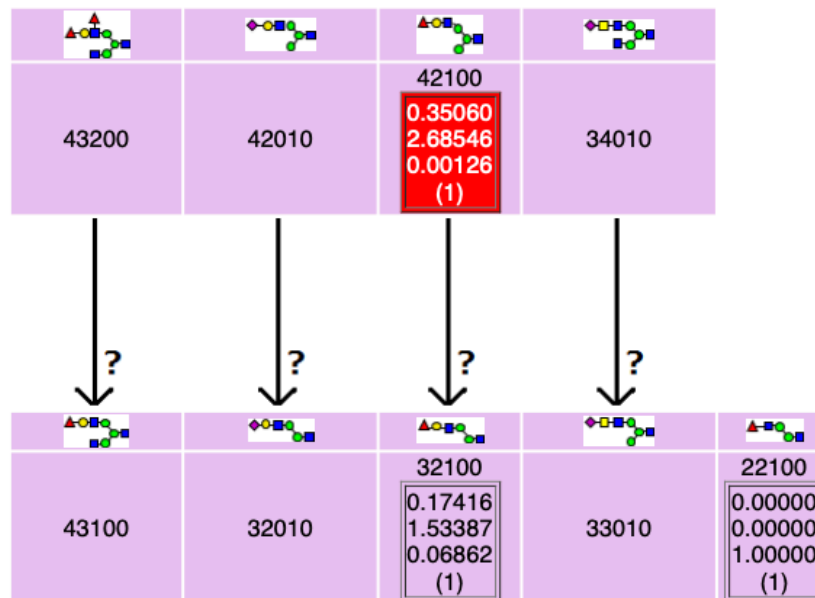

Supplement: s1 [file s1]
