# Supplementary figures and images for: Toolbox Accelerating Glycomics (TAG): Glycan Annotation from MALDI-TOF MS Spectra and Mapping Expression Variation to Biosynthetic Pathways
Source: MDPI journal article supplement (doi:10.3390/biom10101383), 2020-09-28

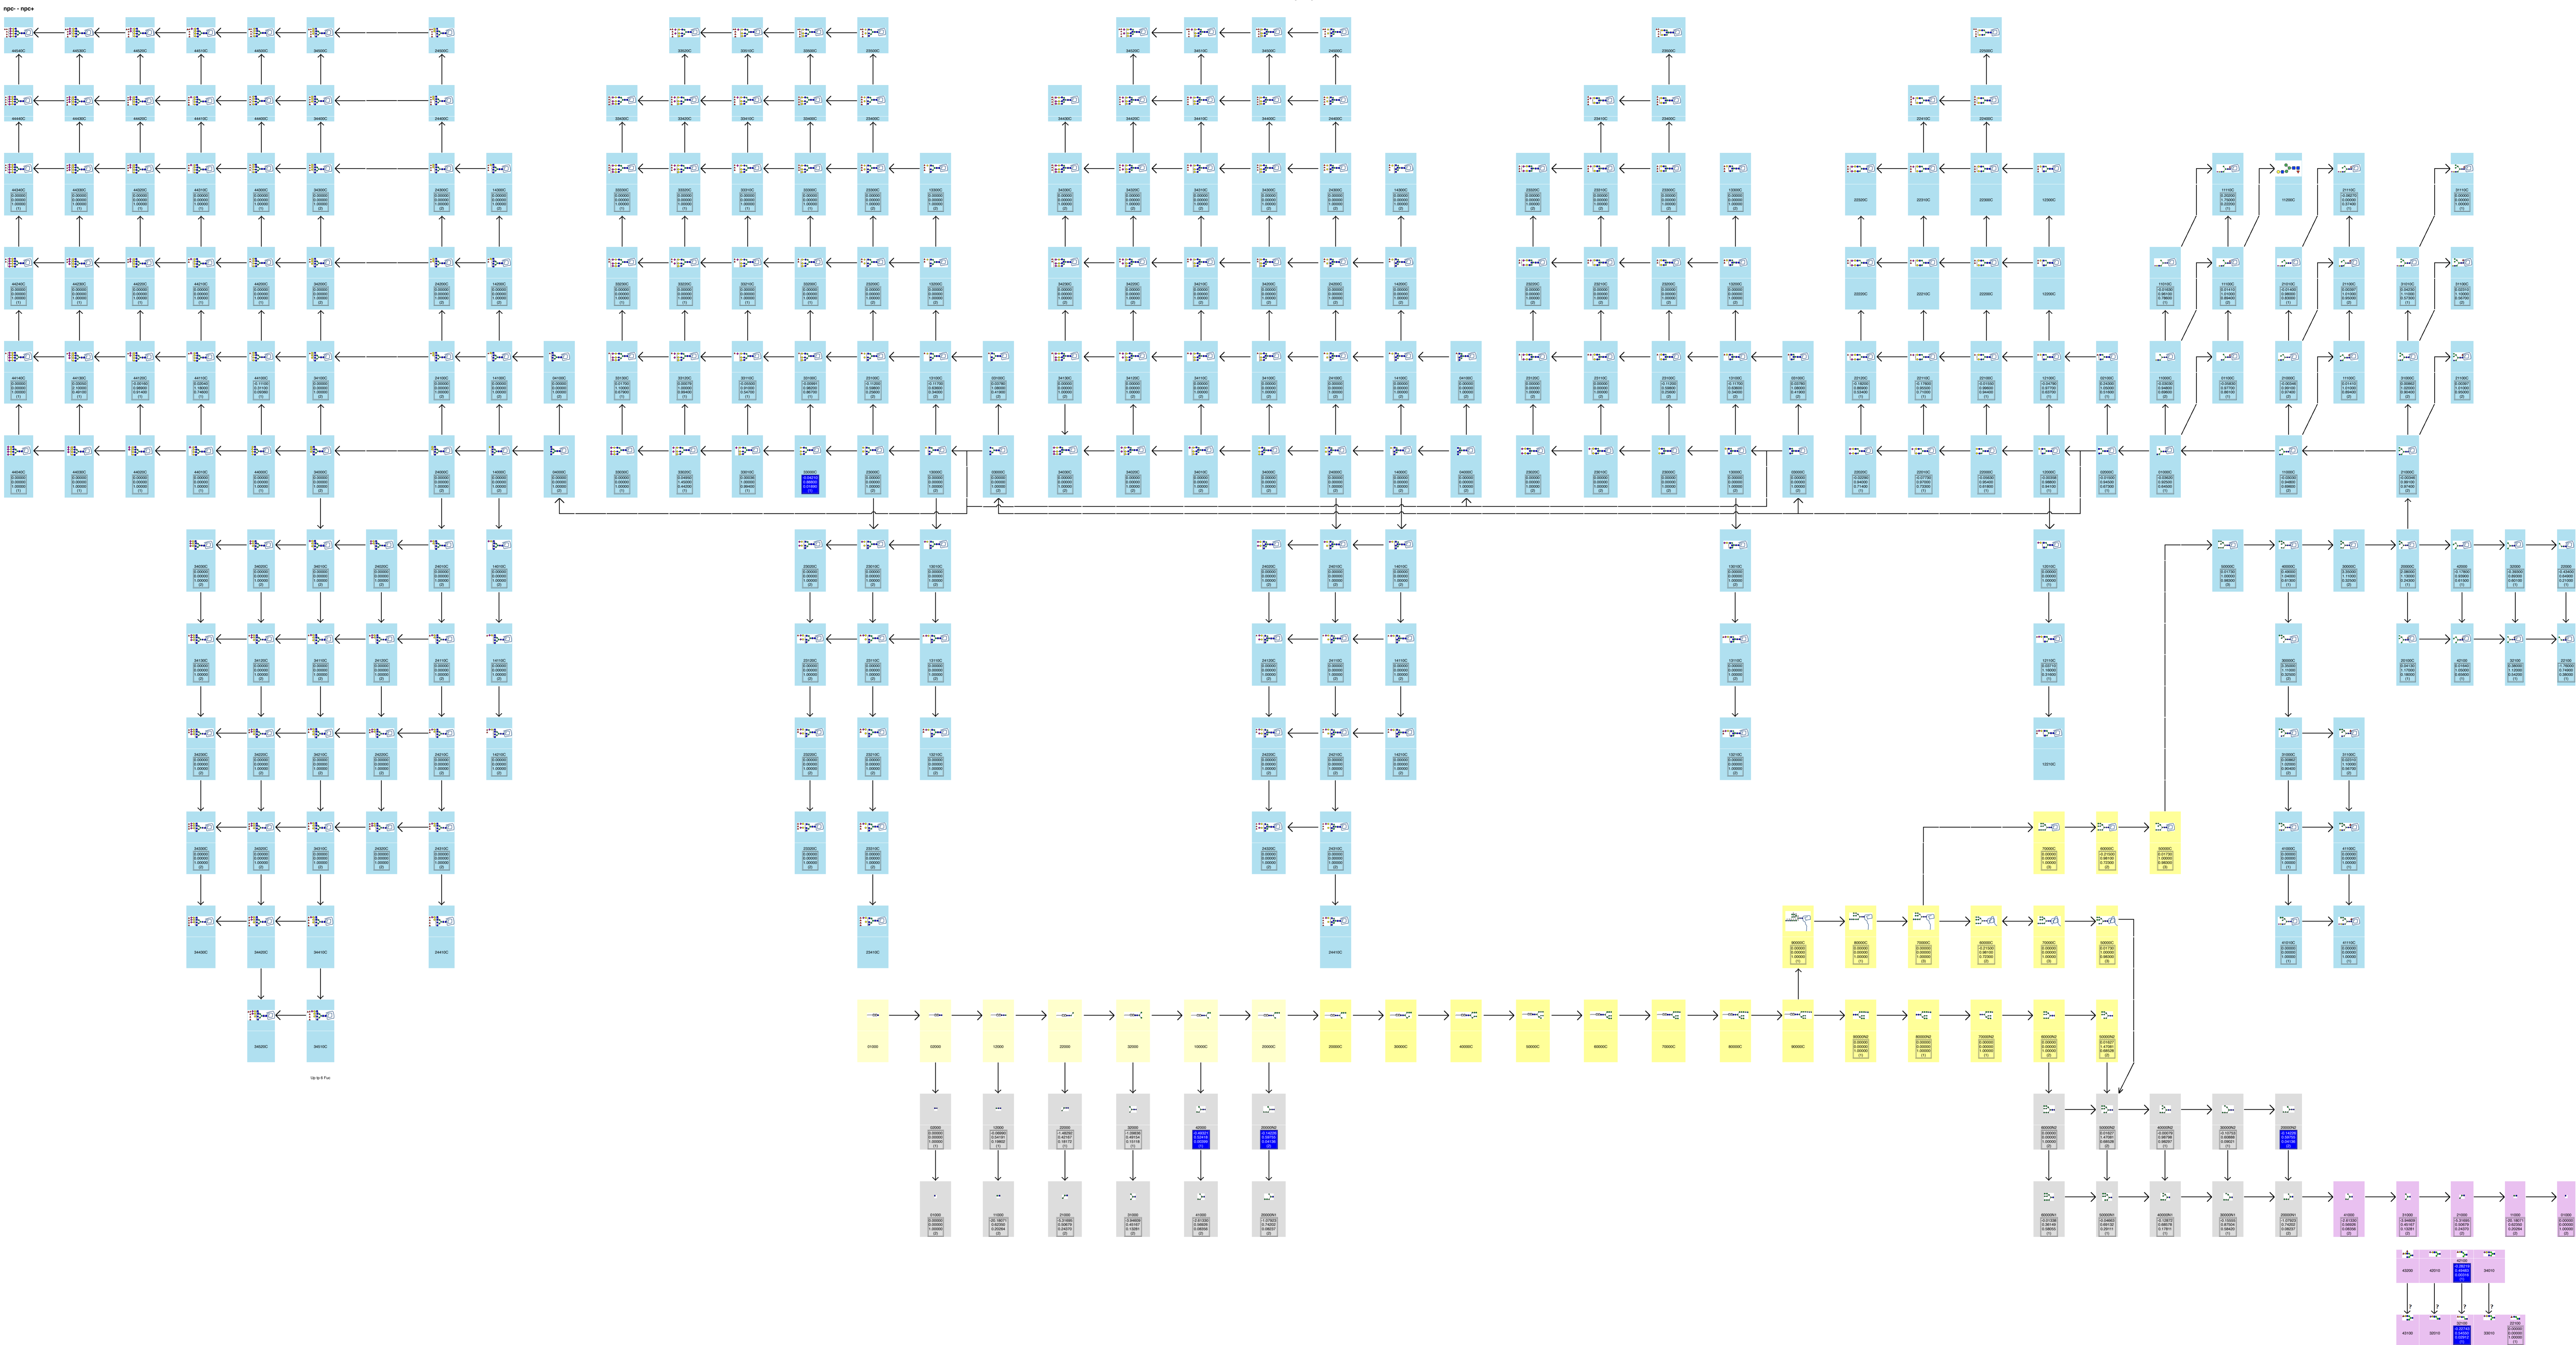

Supplement: s1 [file s1]

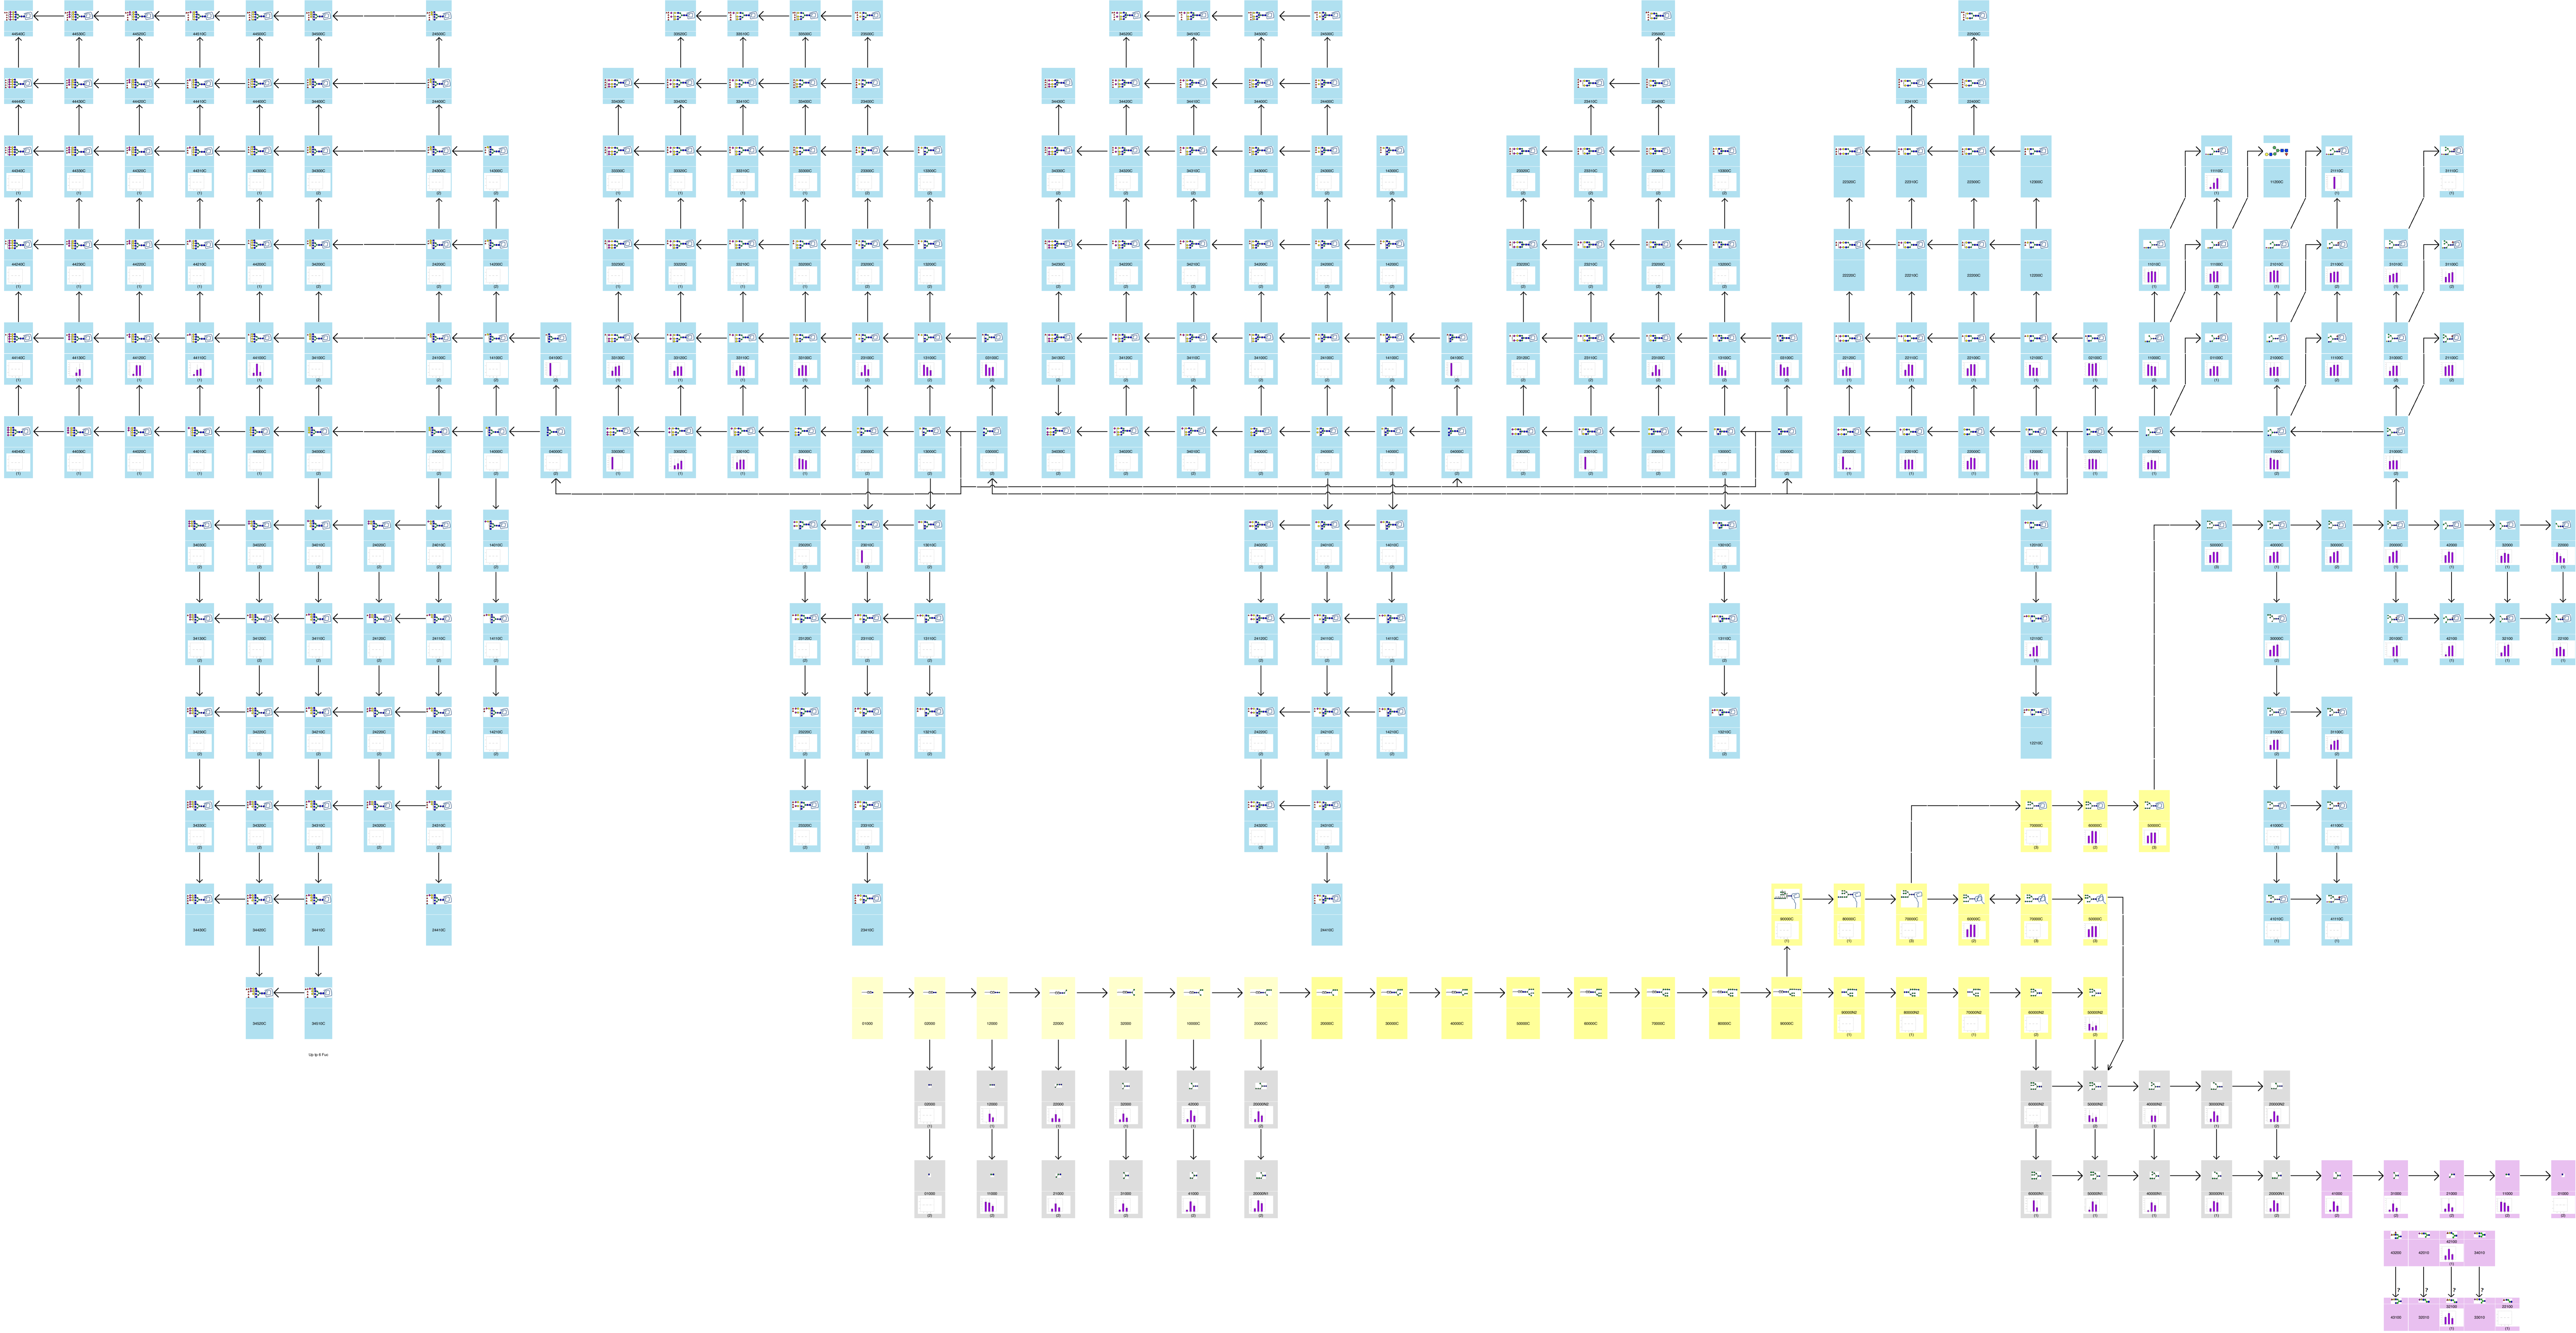

Supplement: s1 [file s1]
